# Supplementary figures and images for: Causal Effects of Gut Microbiota on Sleep-Related Phenotypes: A Two-Sample Mendelian Randomization Study
Source: MDPI journal article supplement (doi:10.3390/clockssleep5030037), 2023-09-12

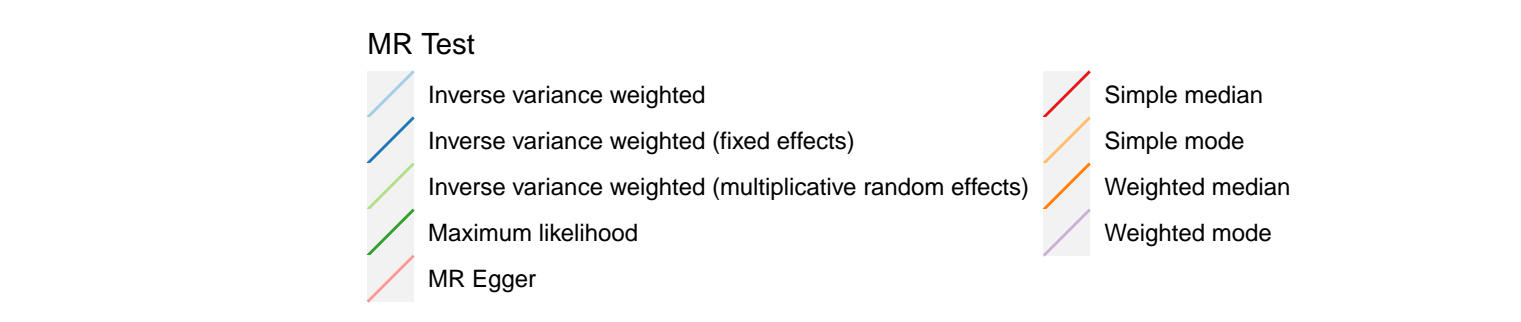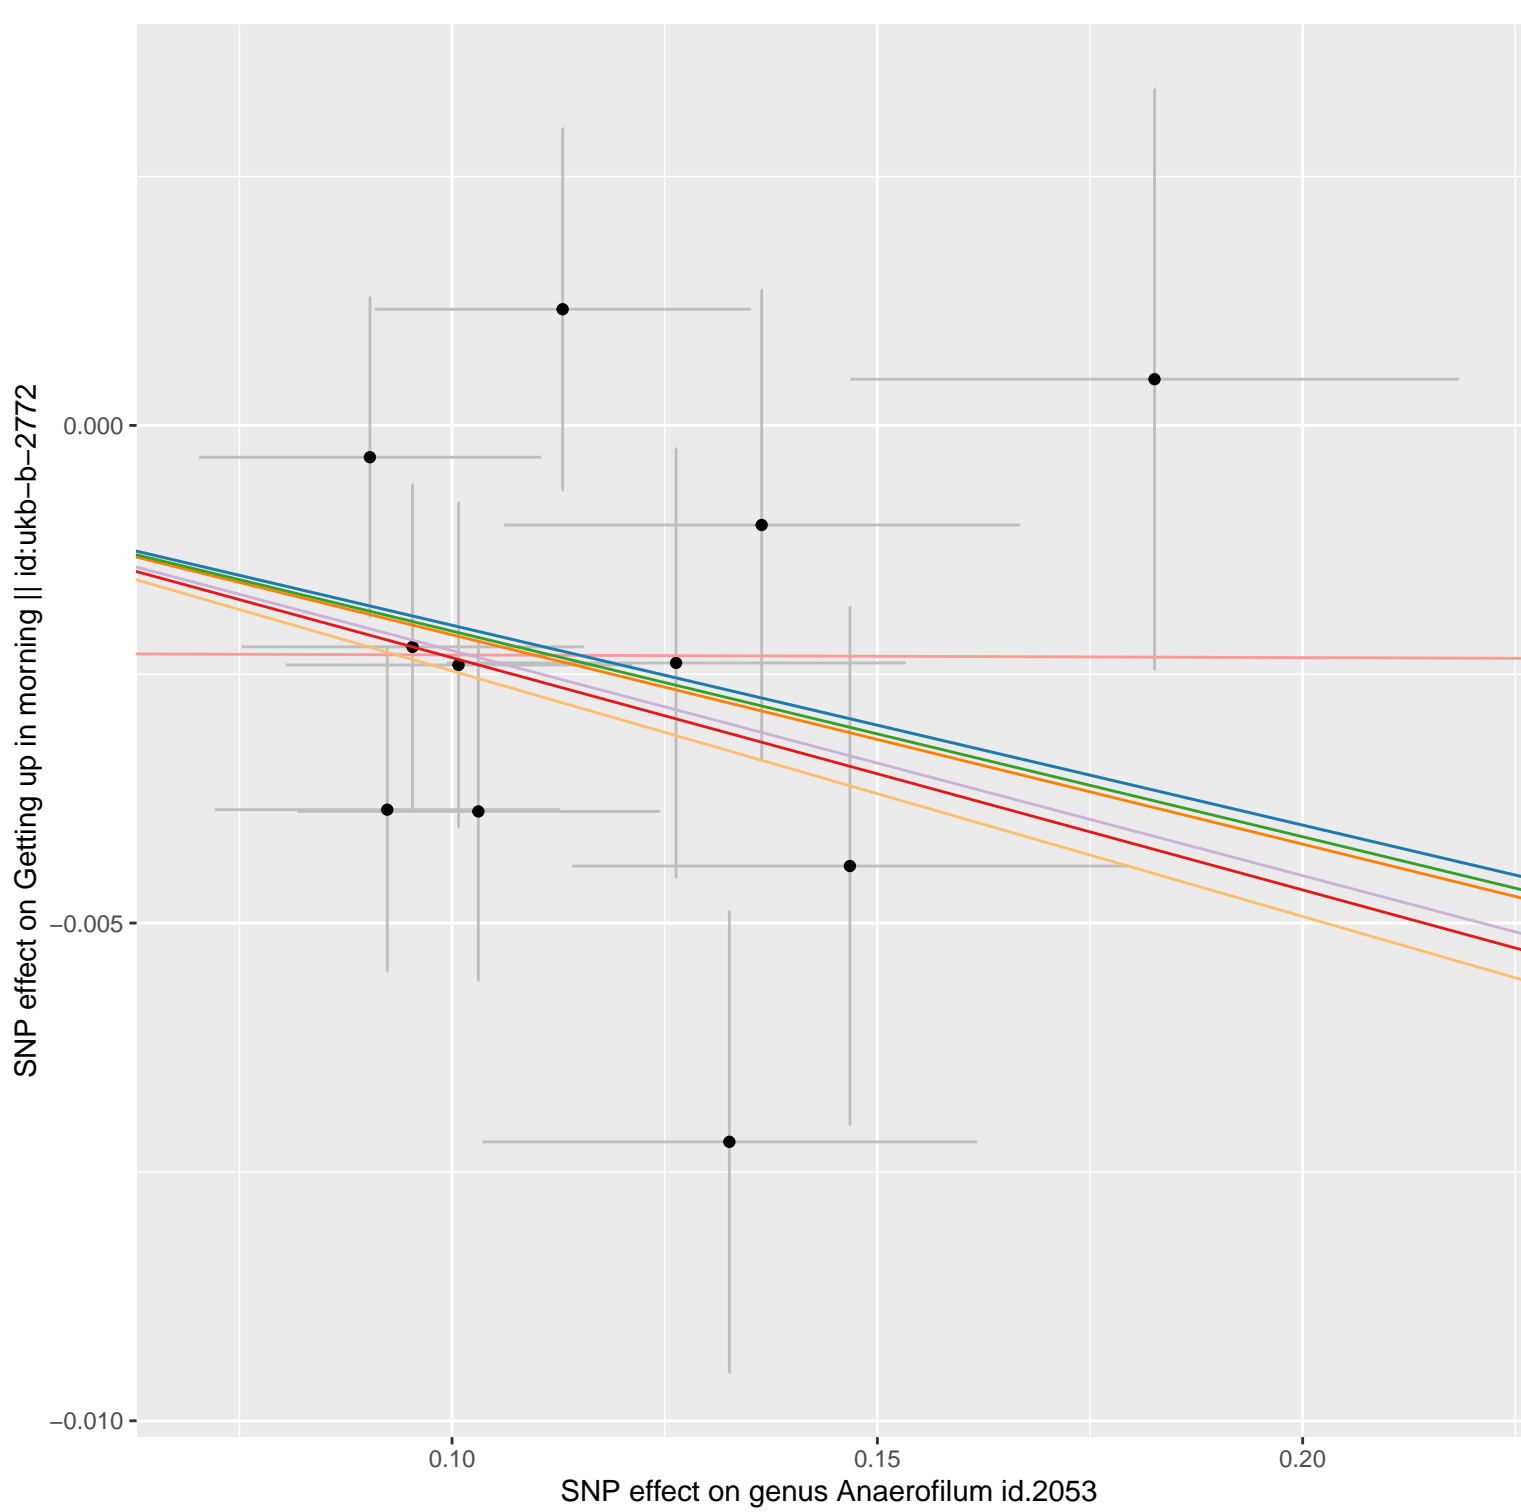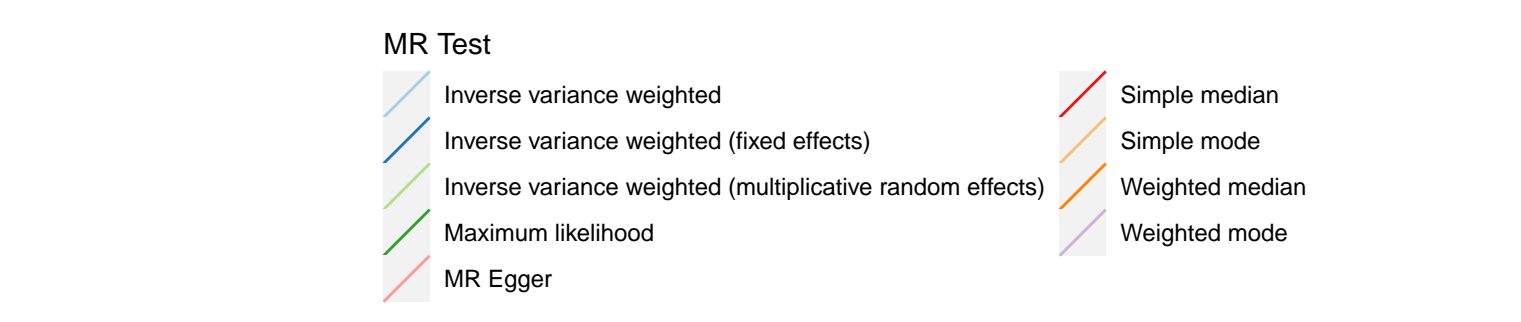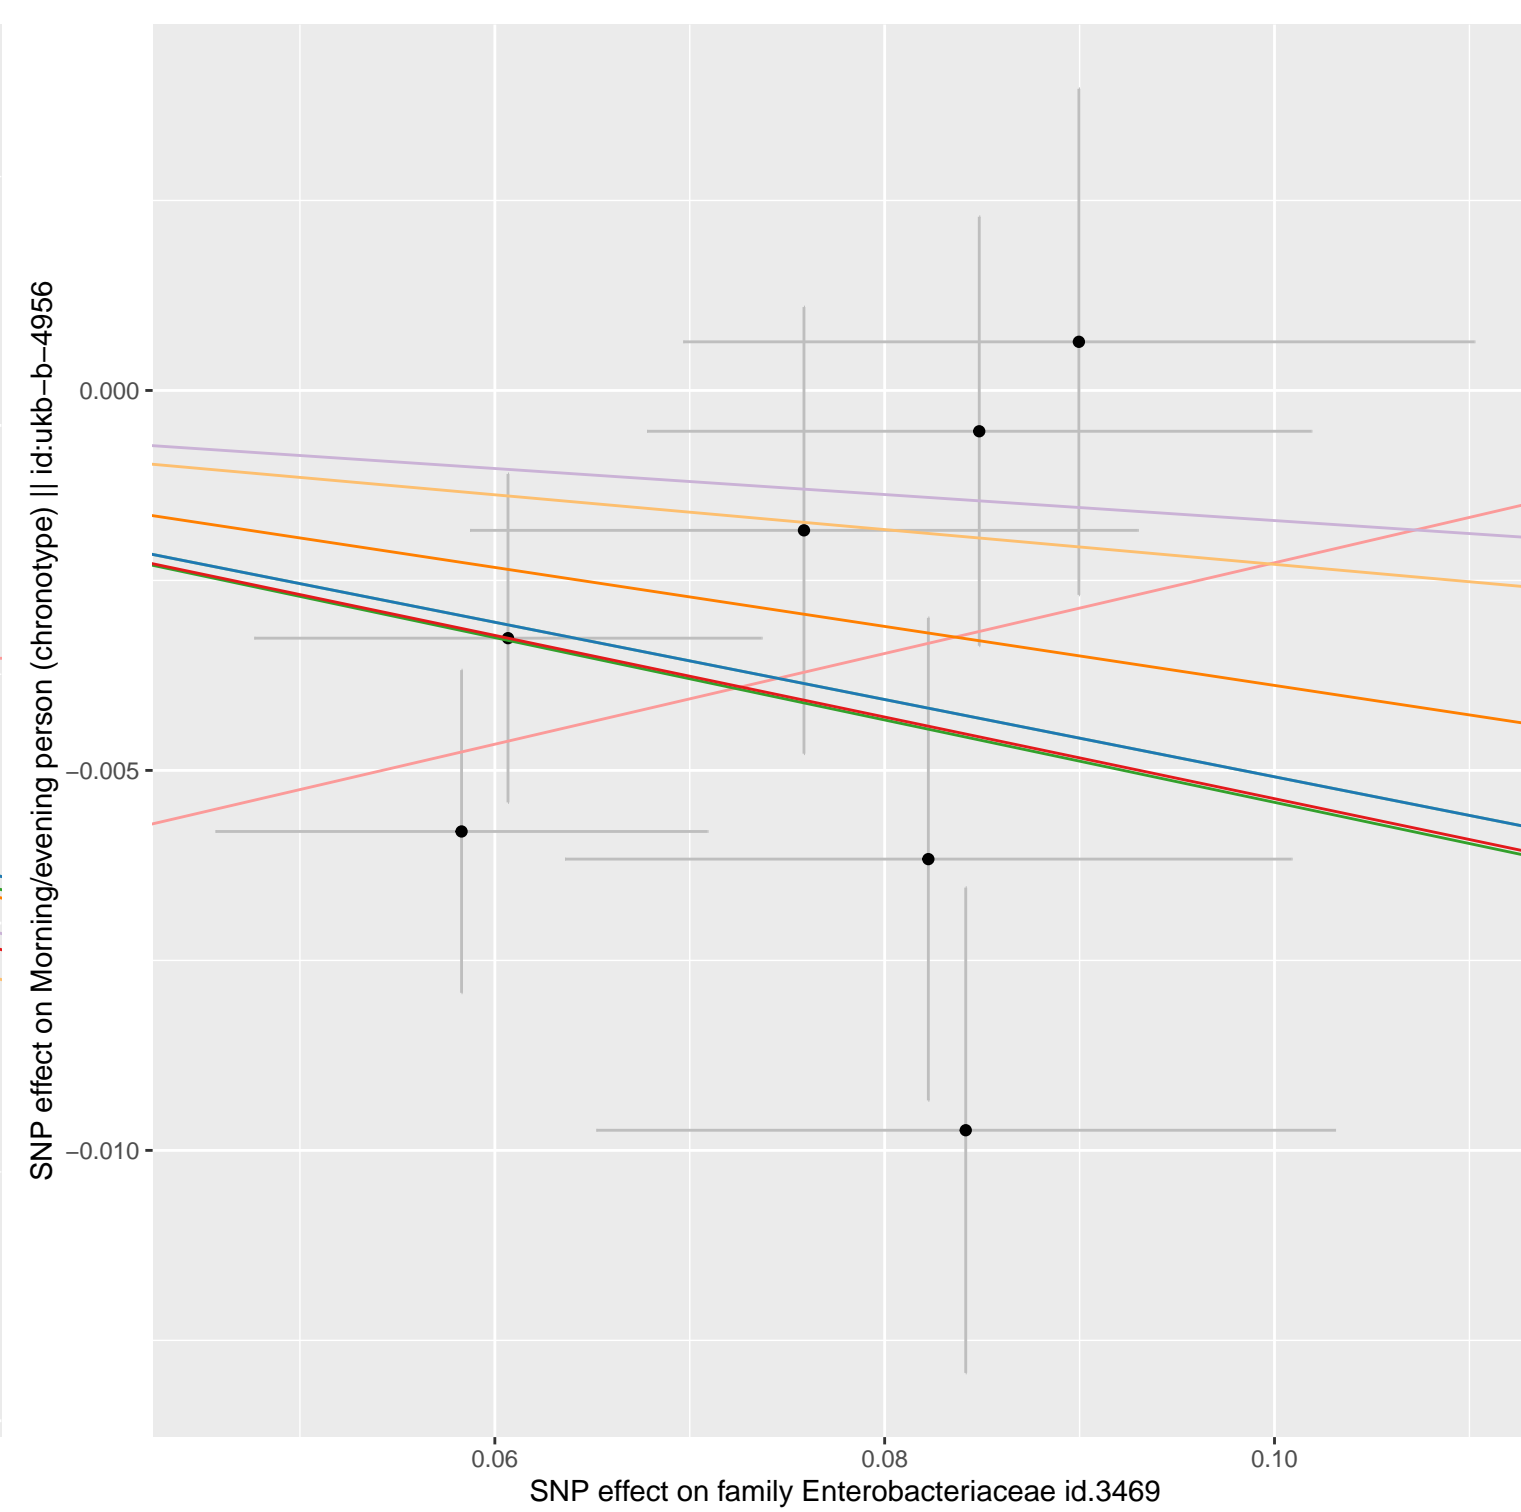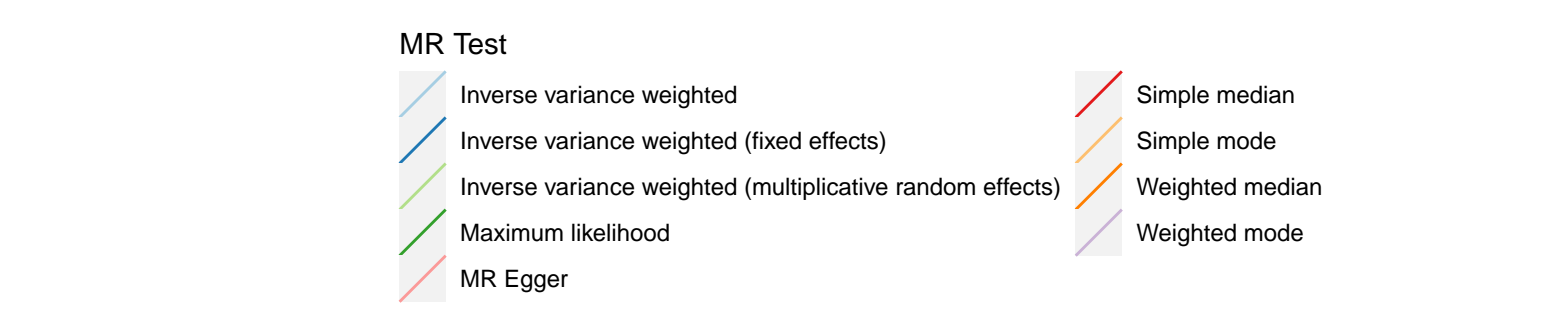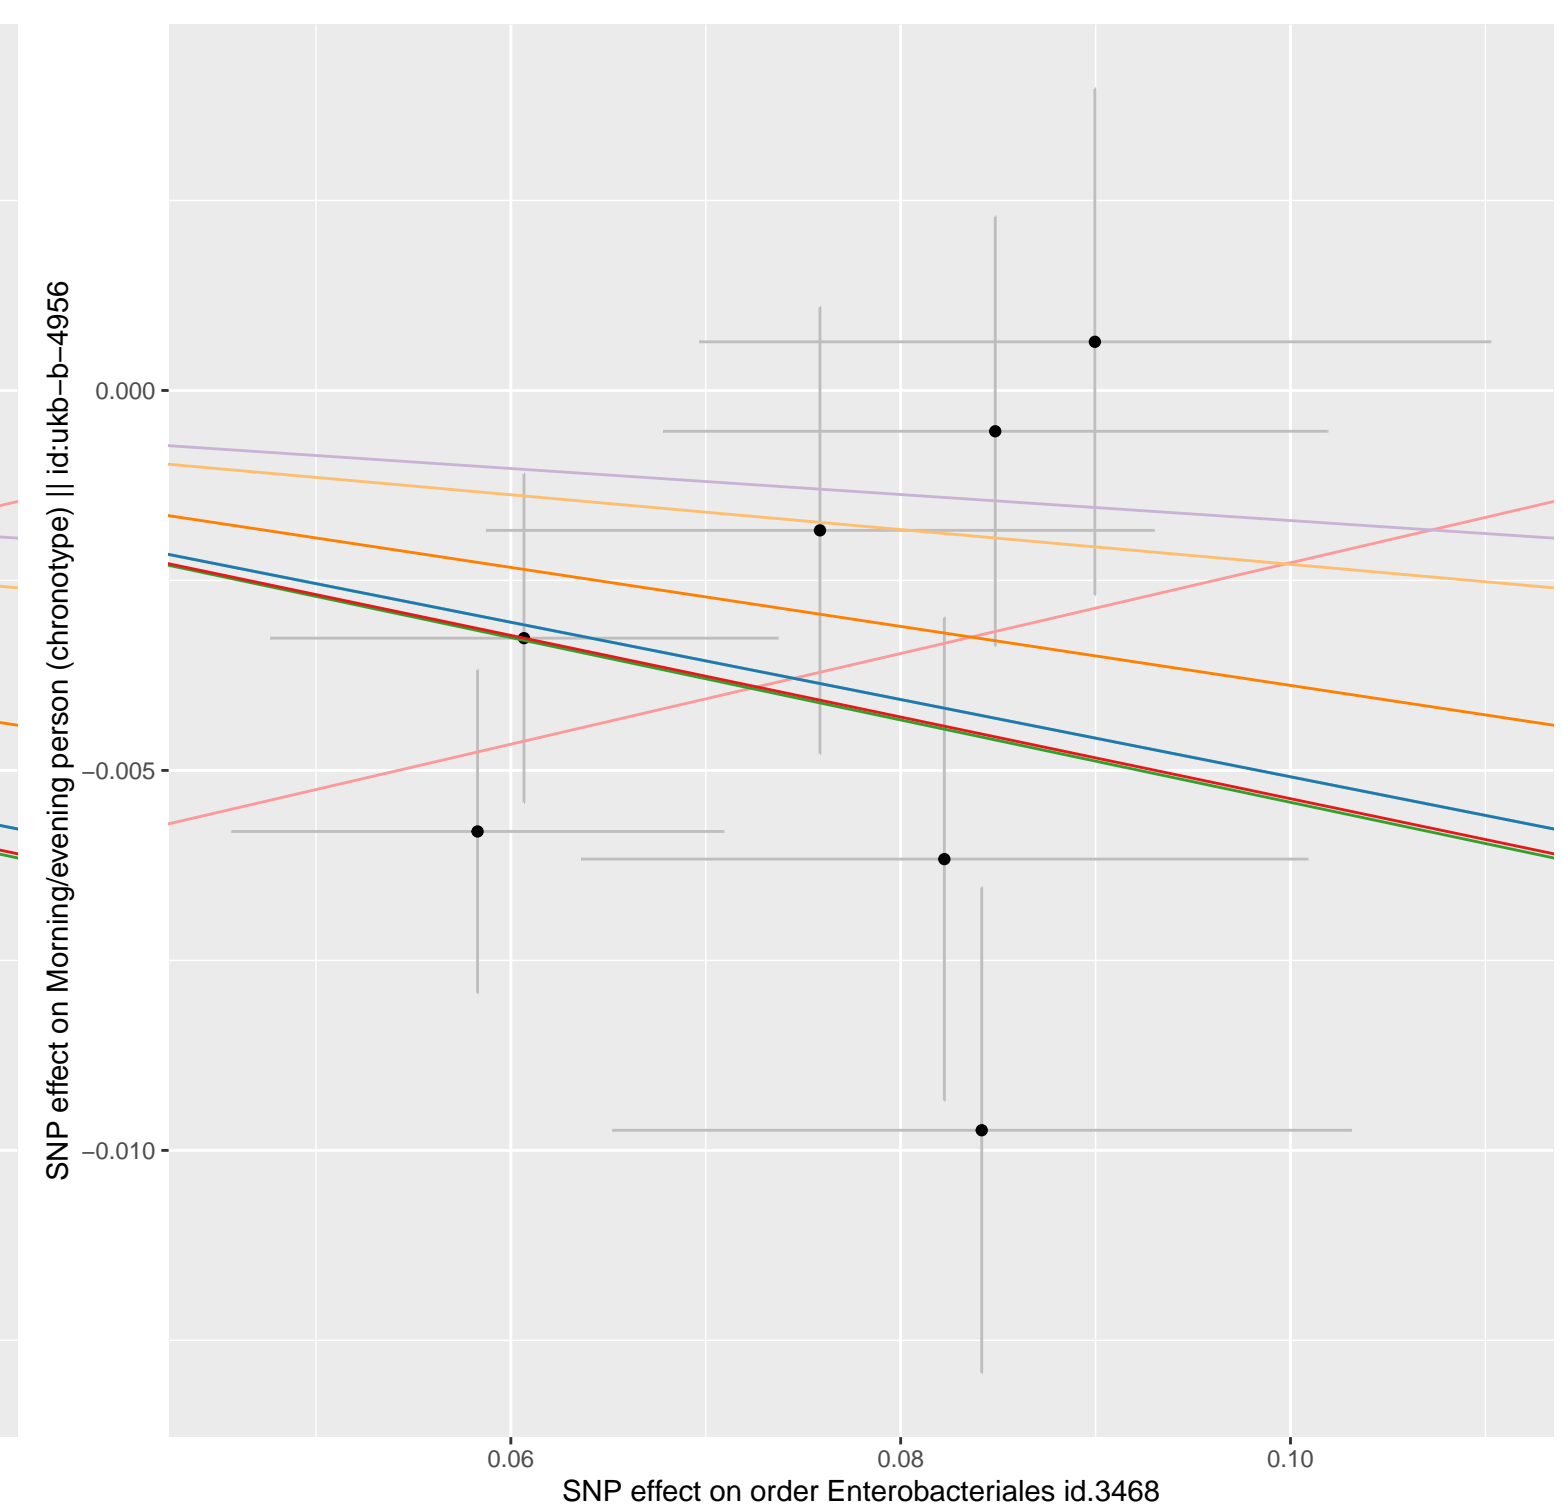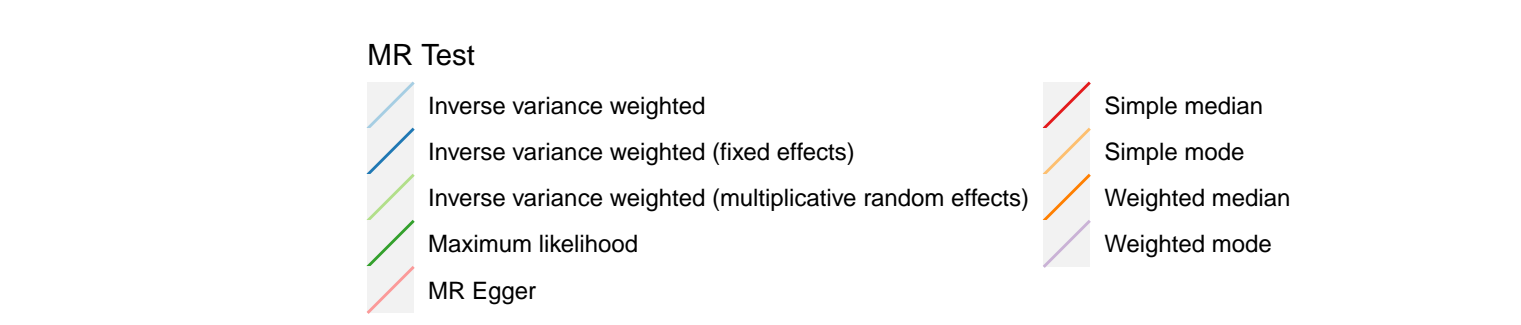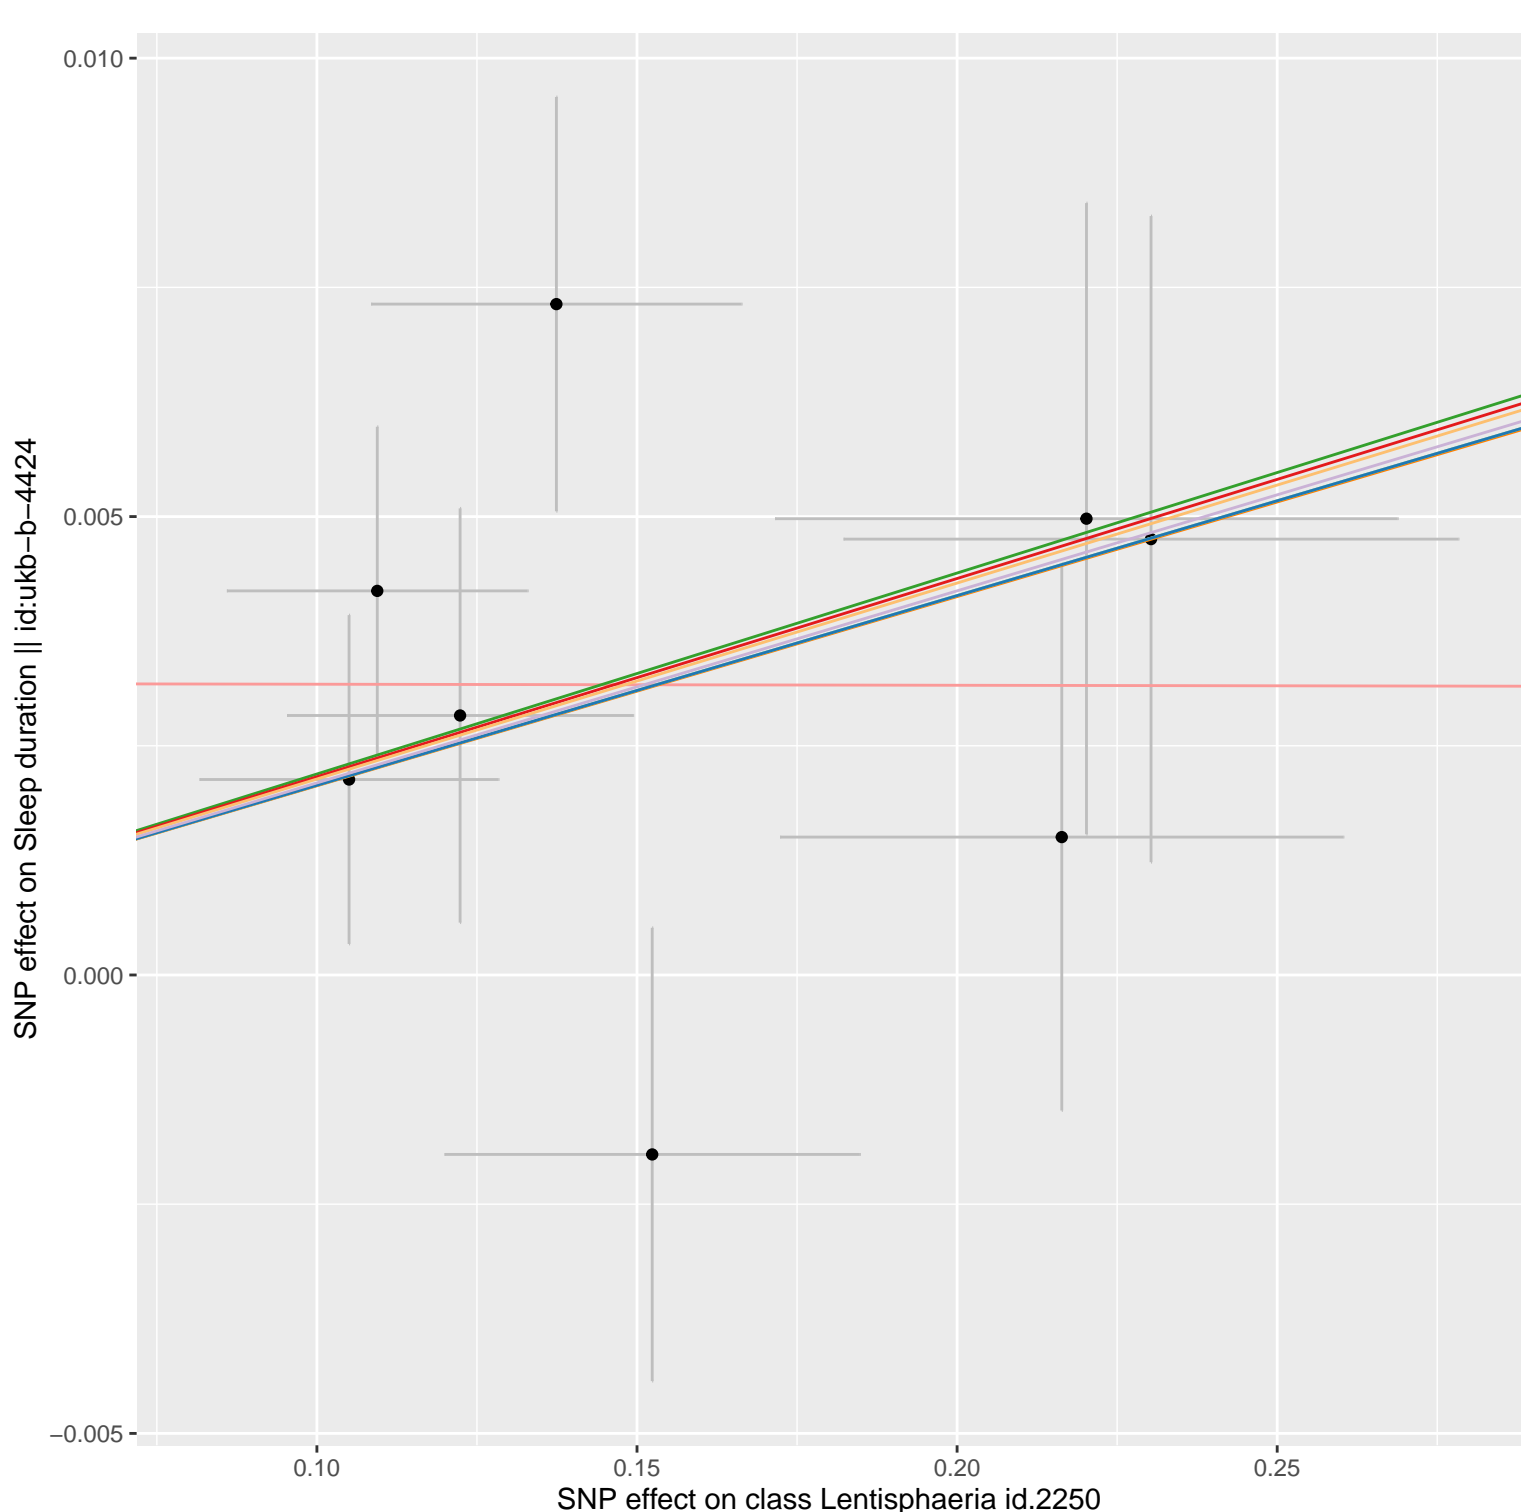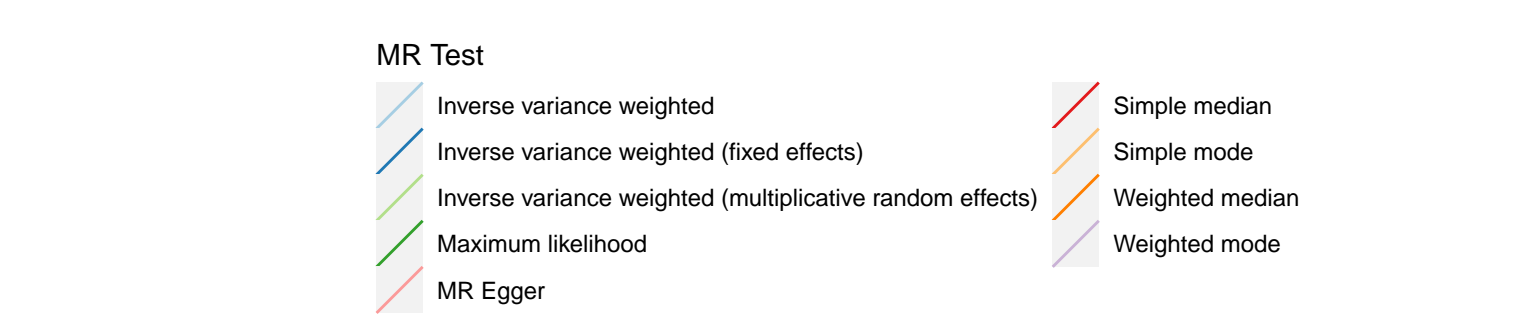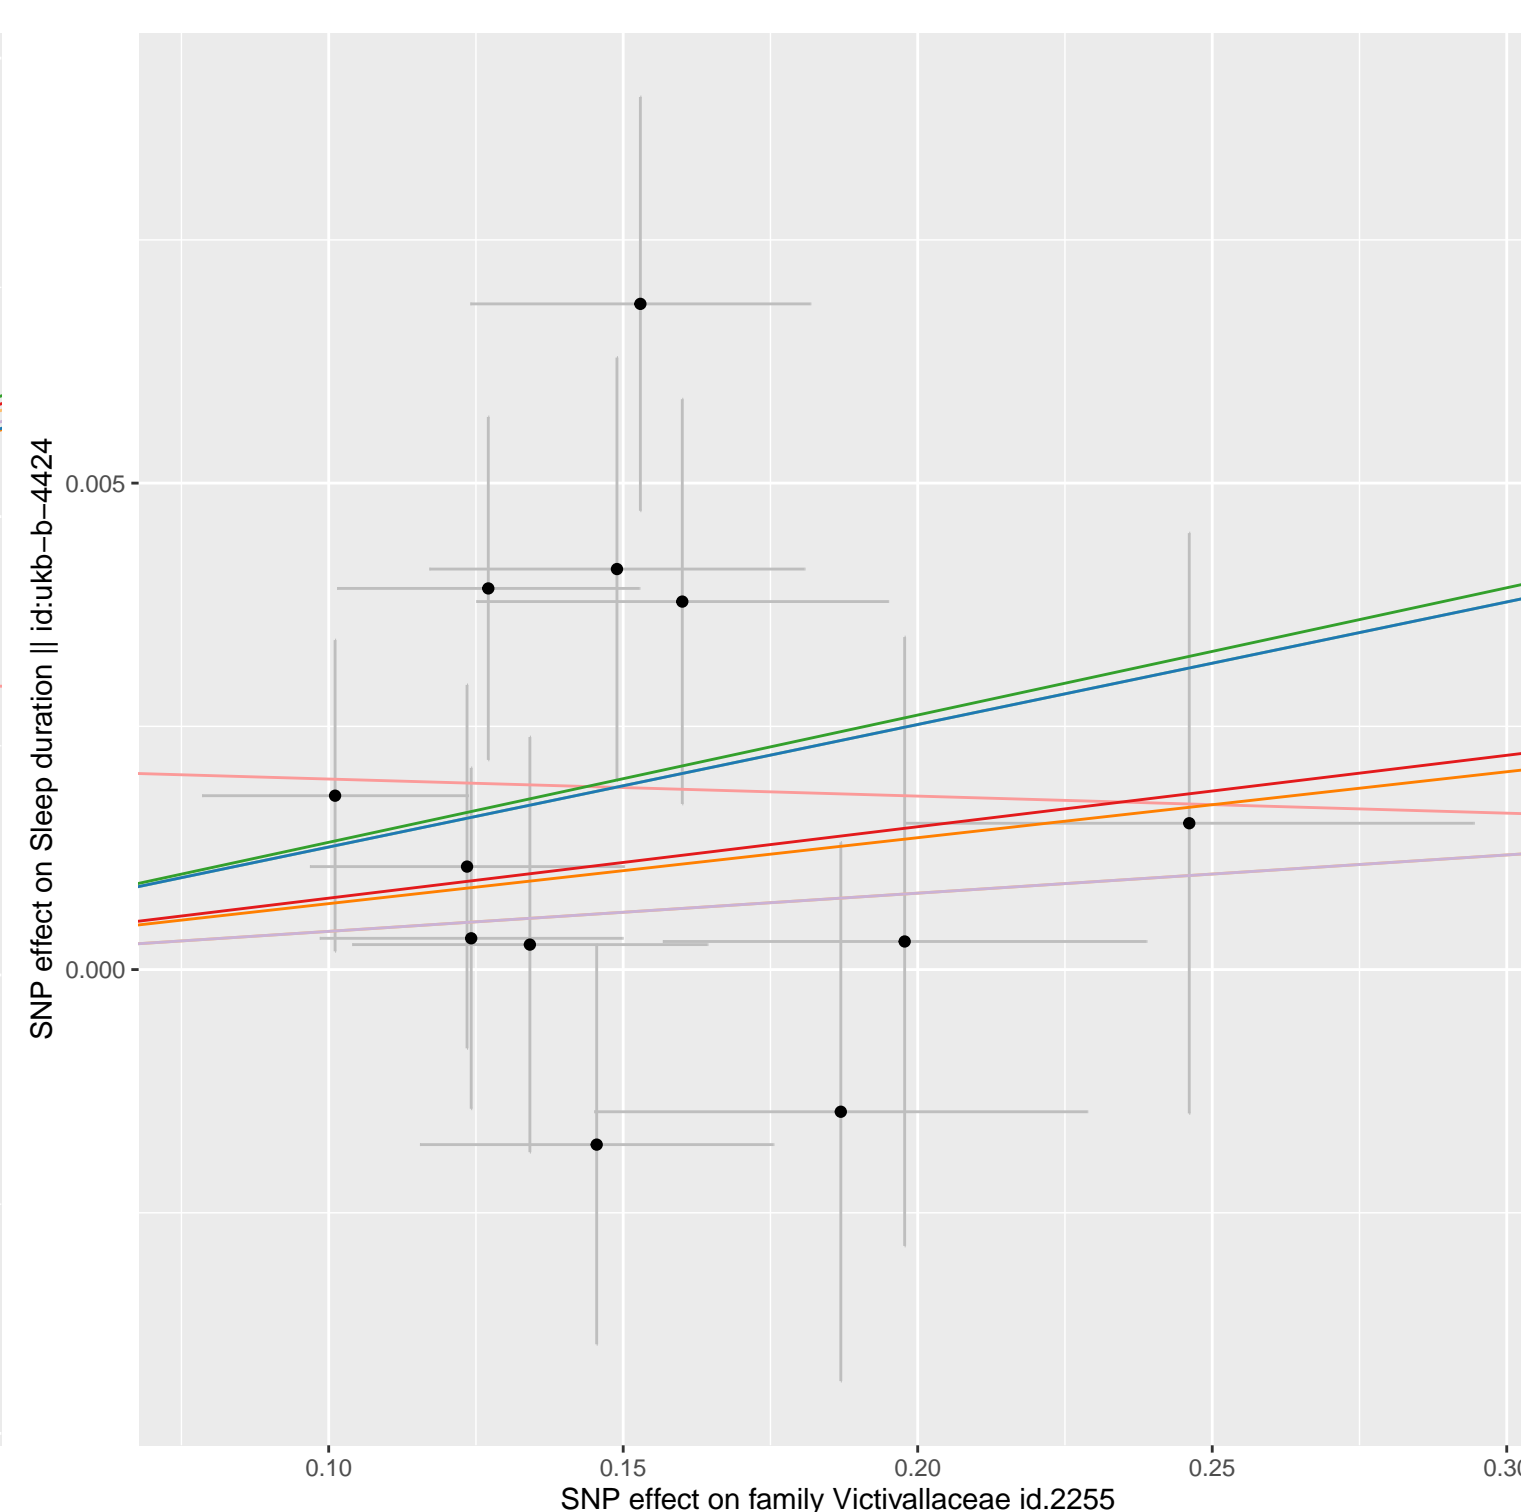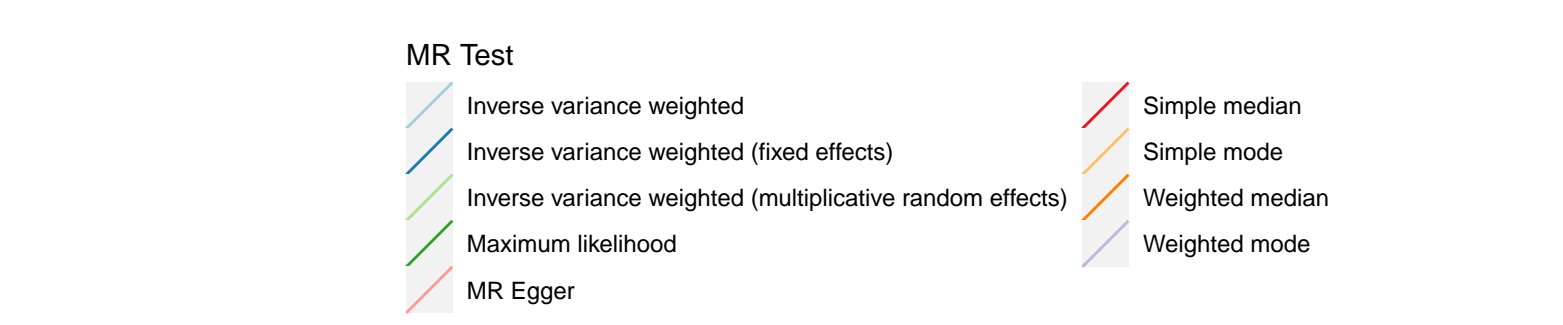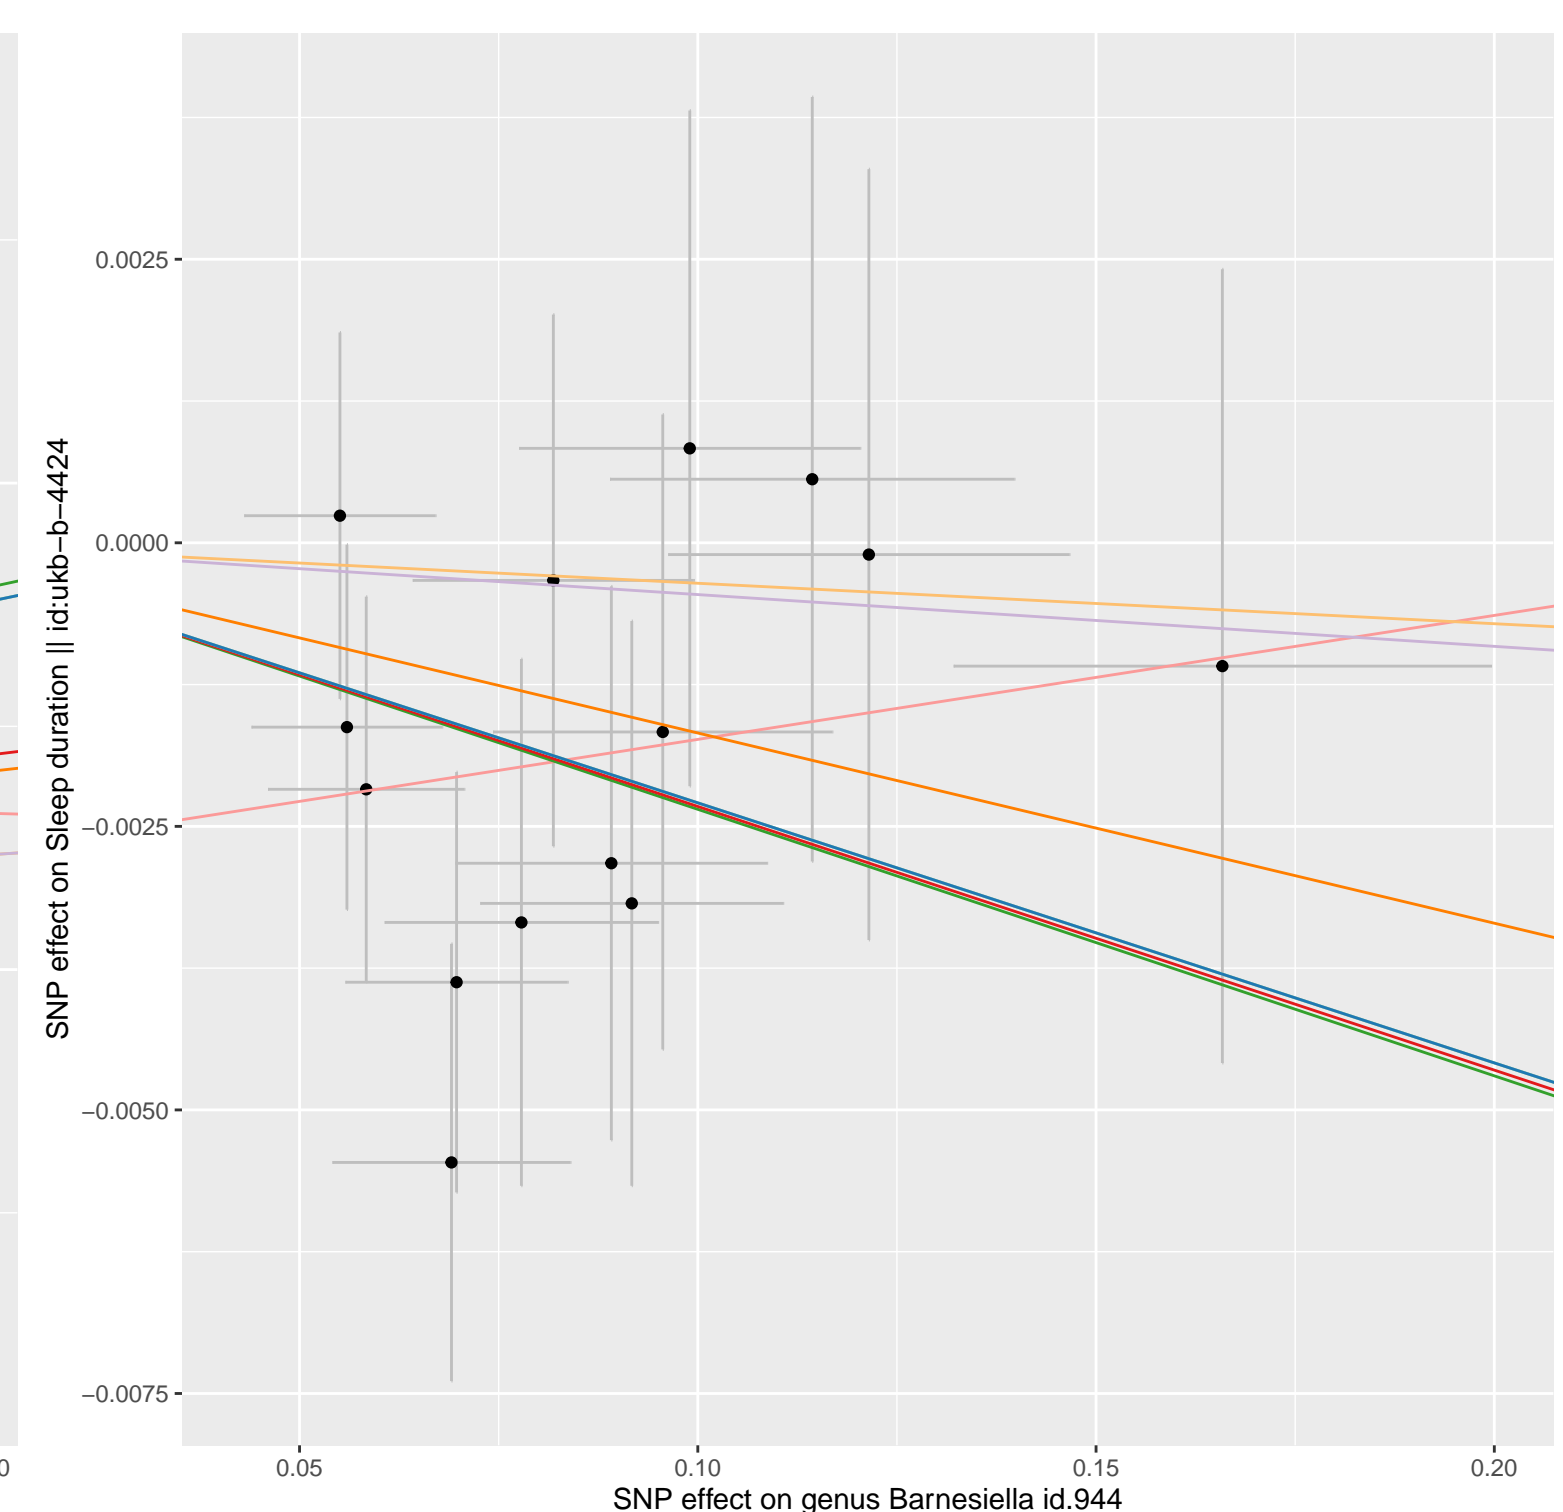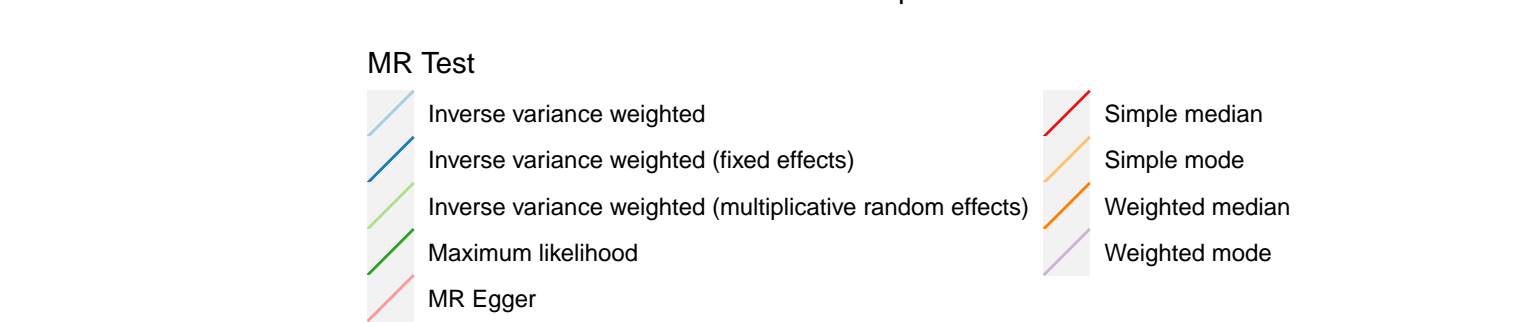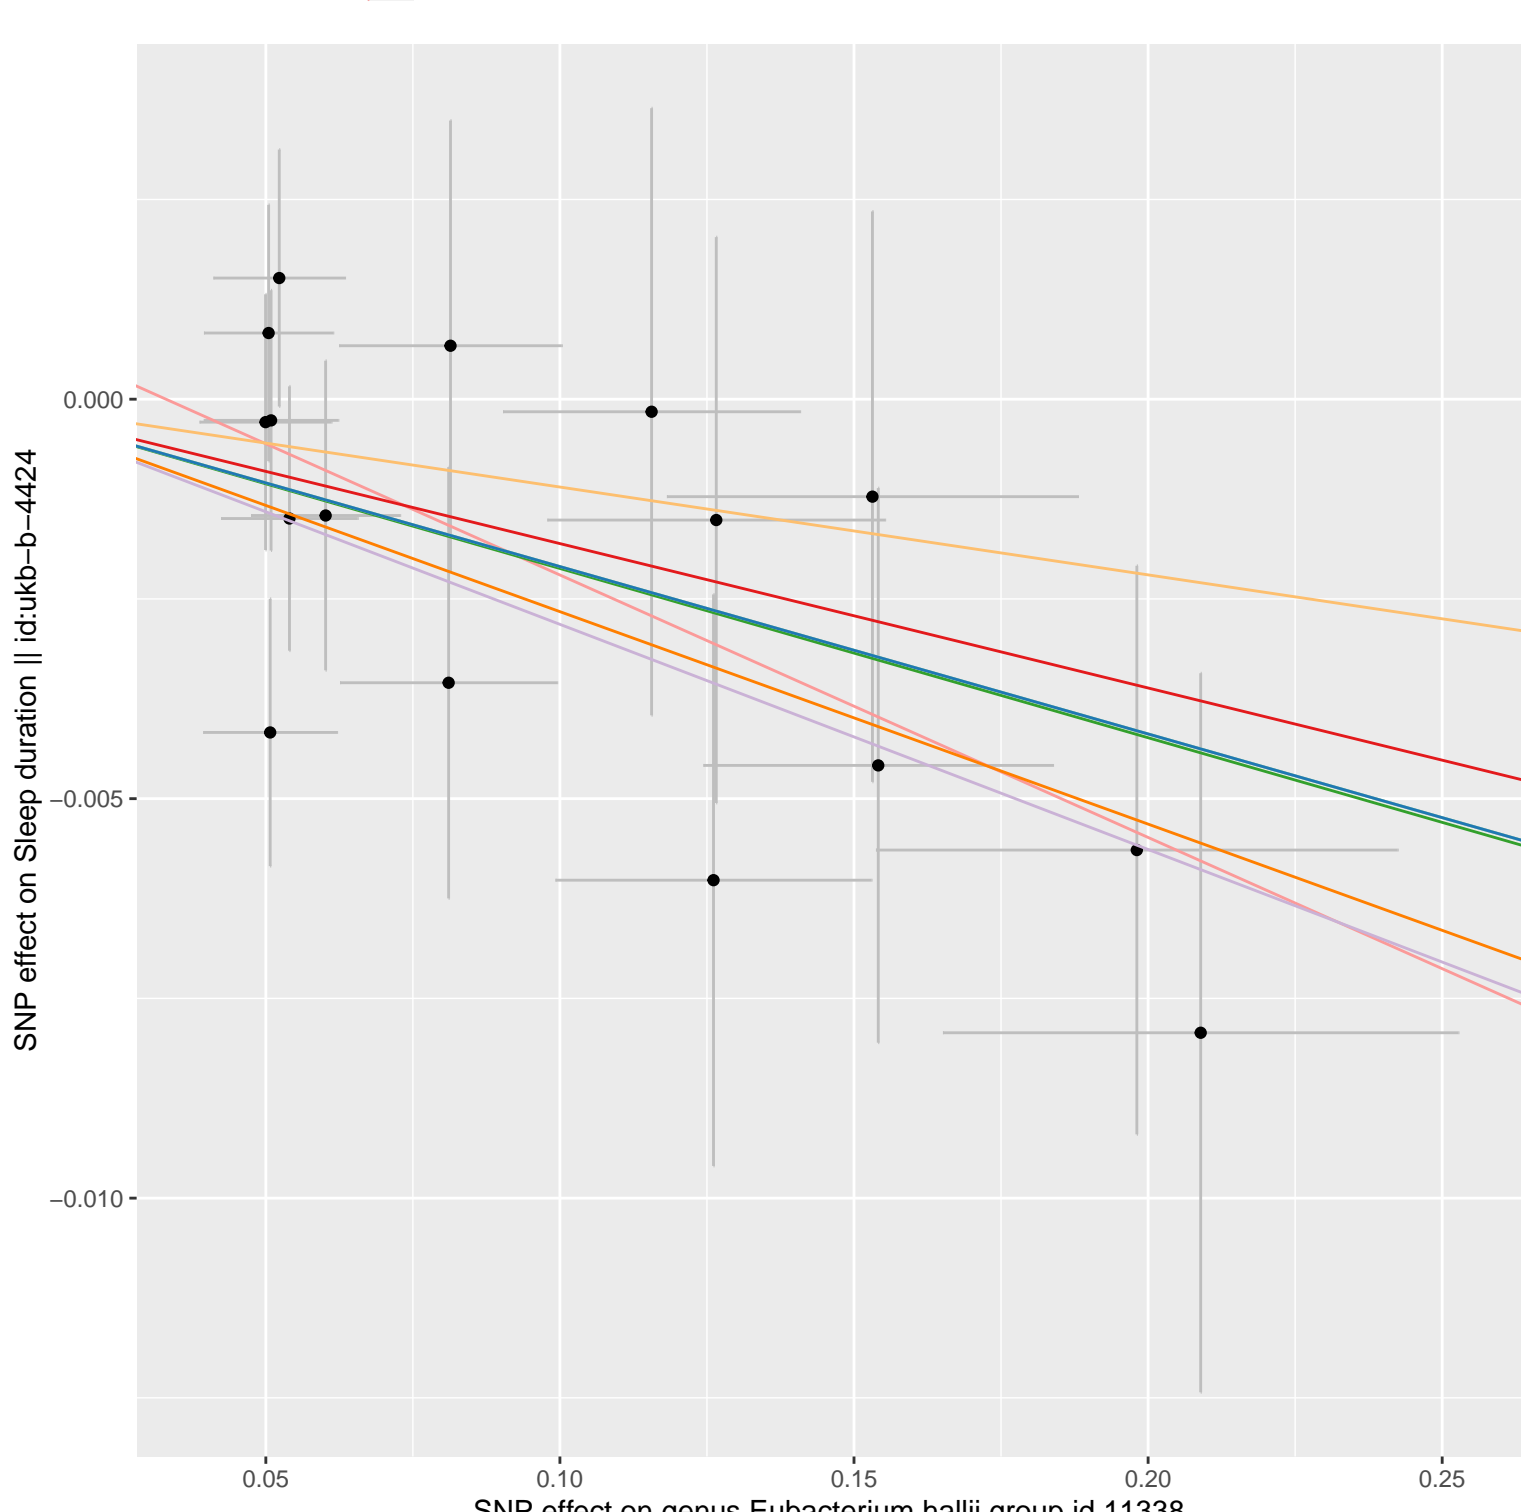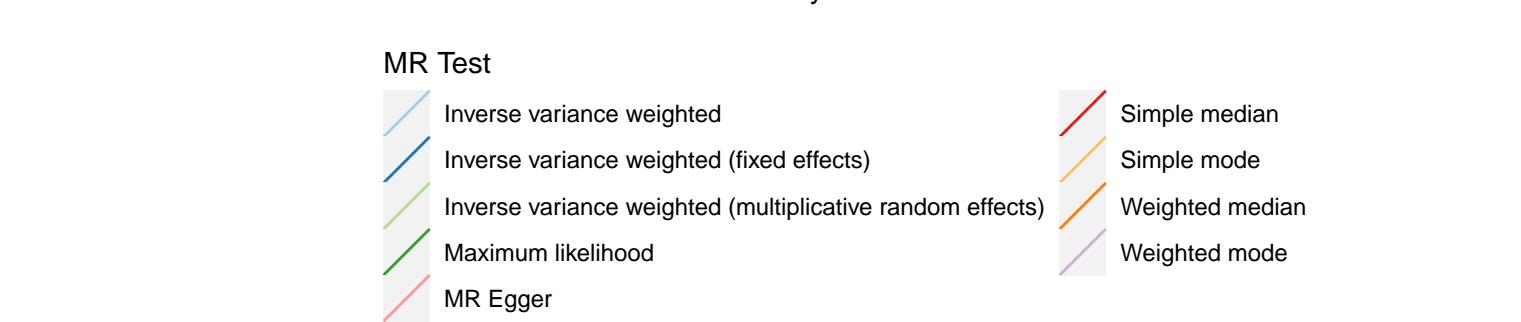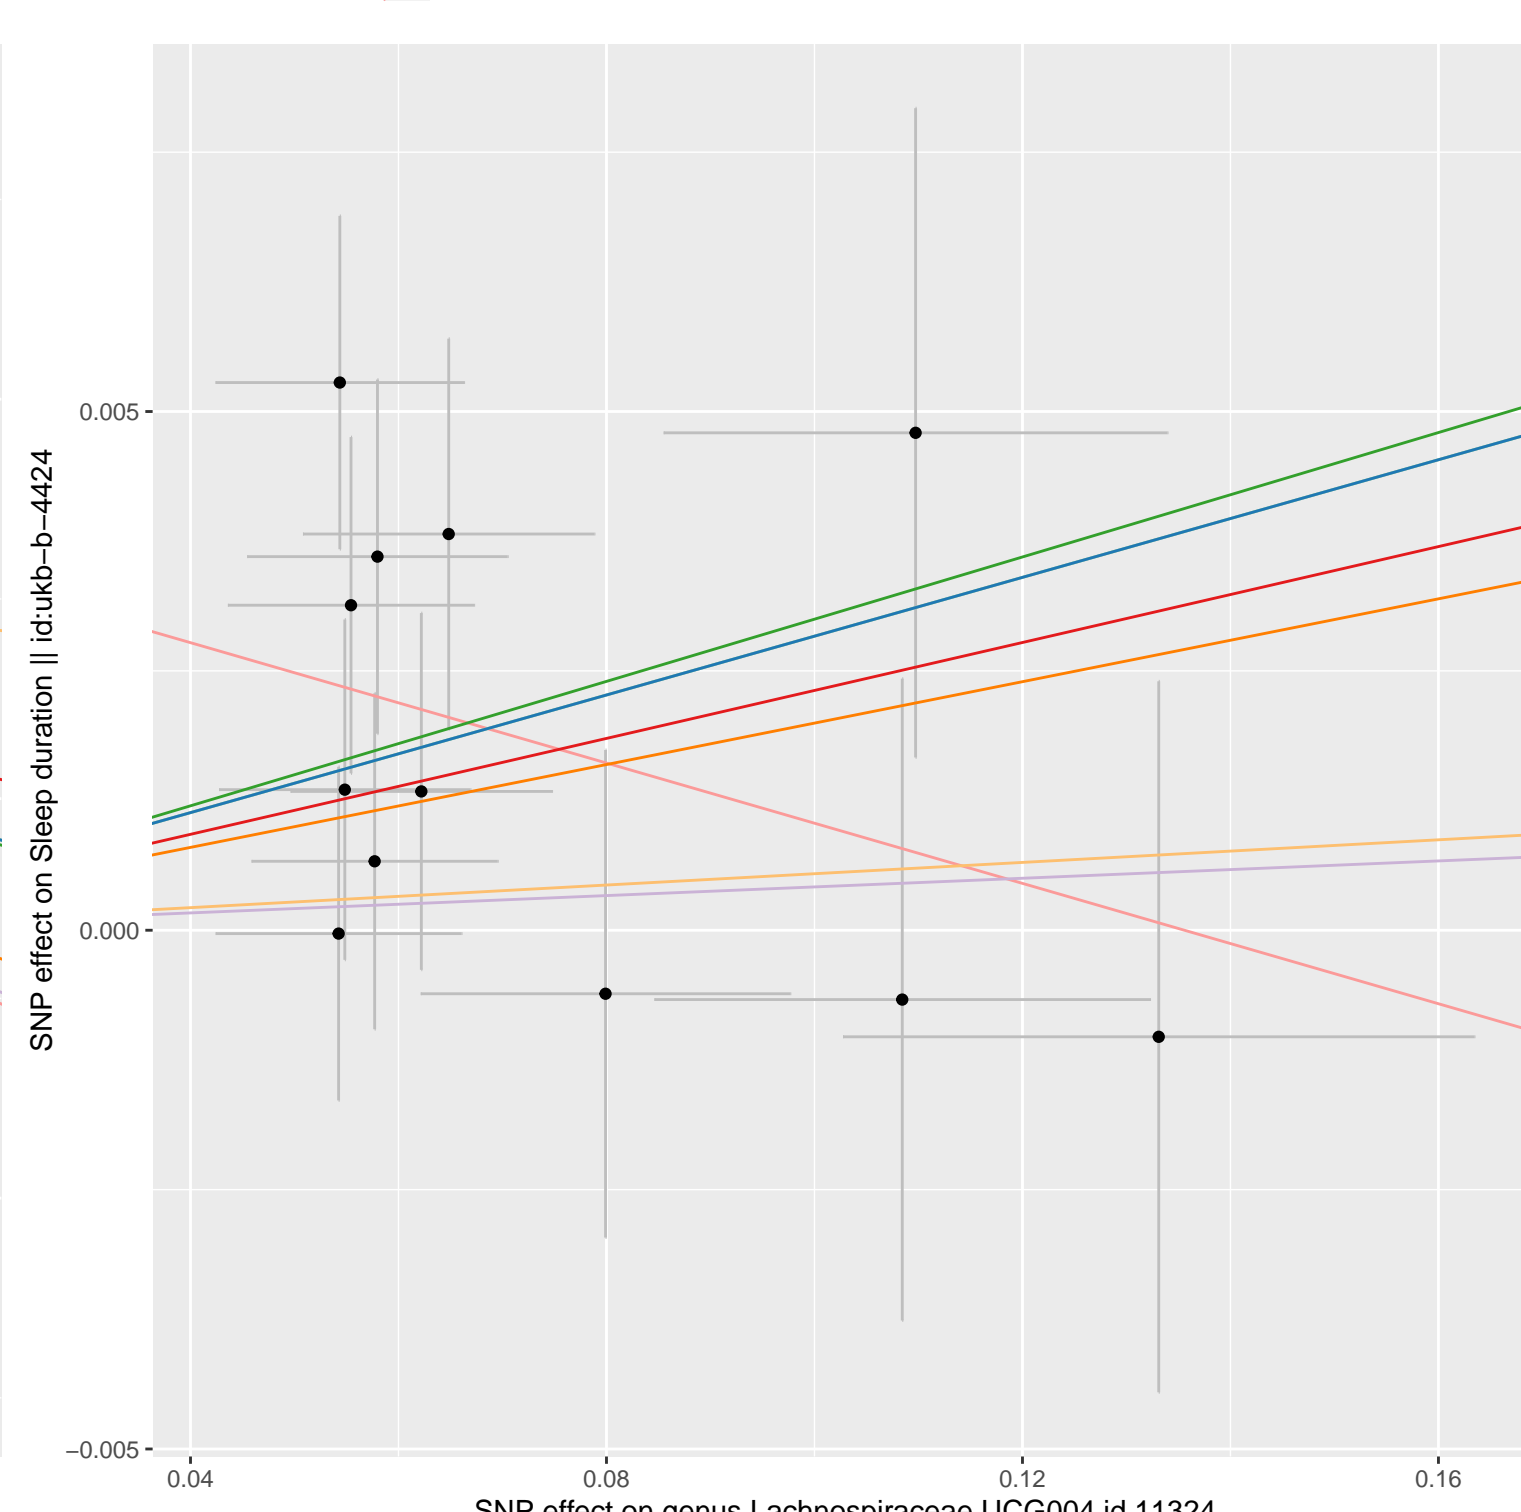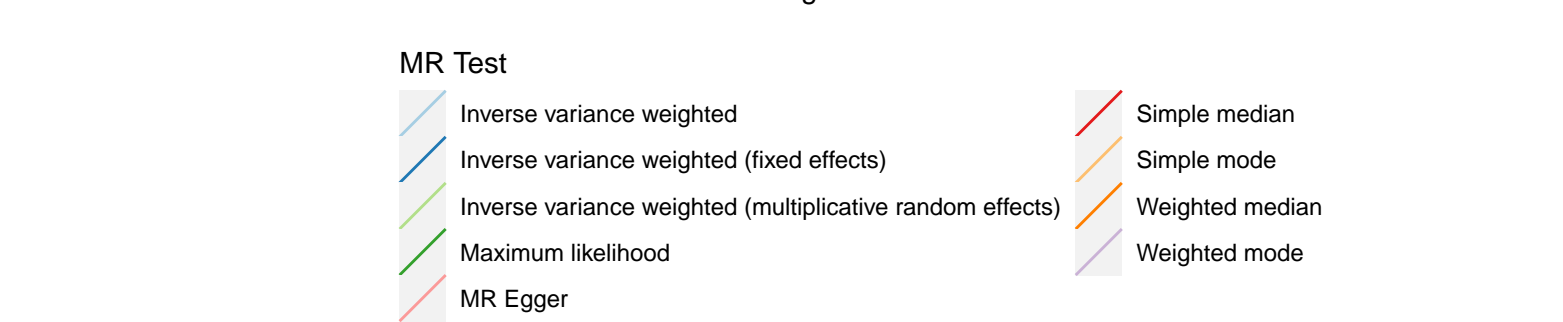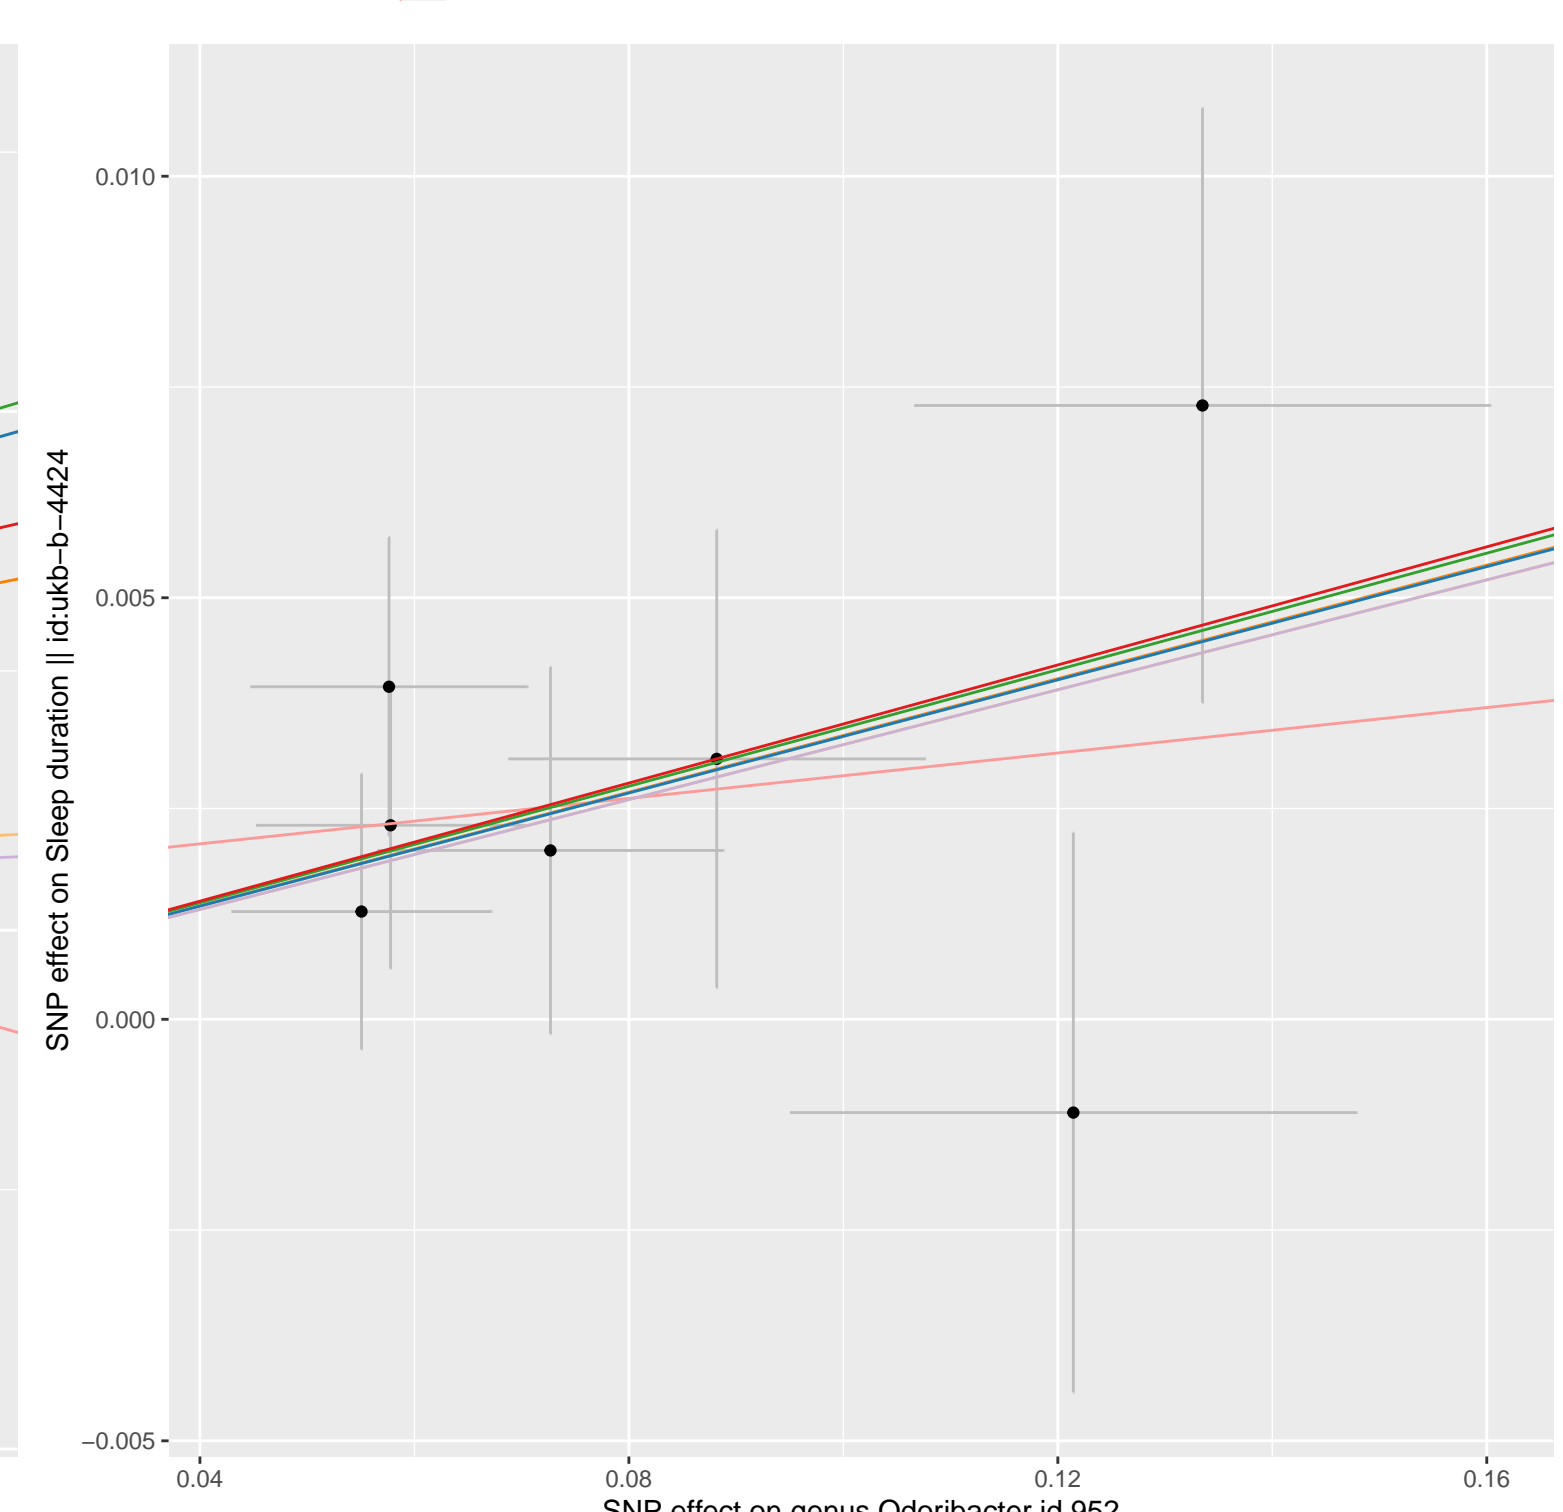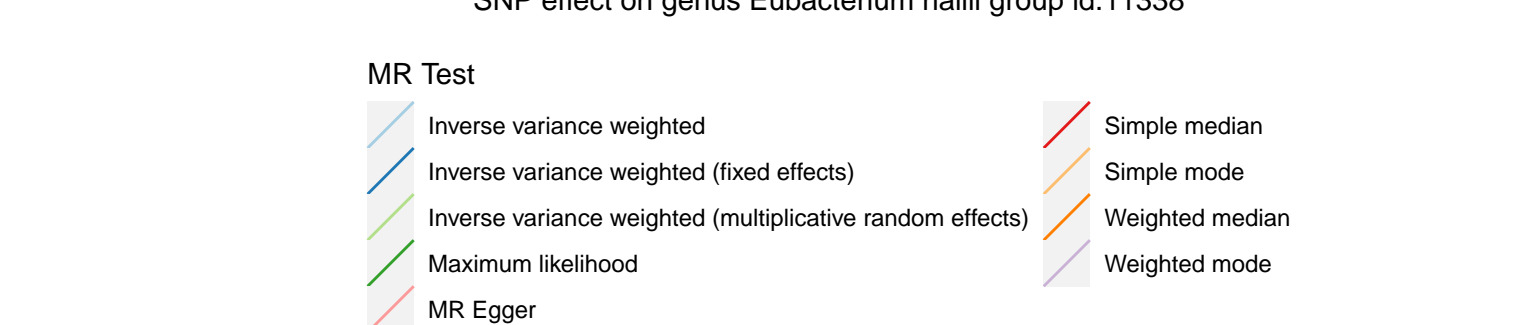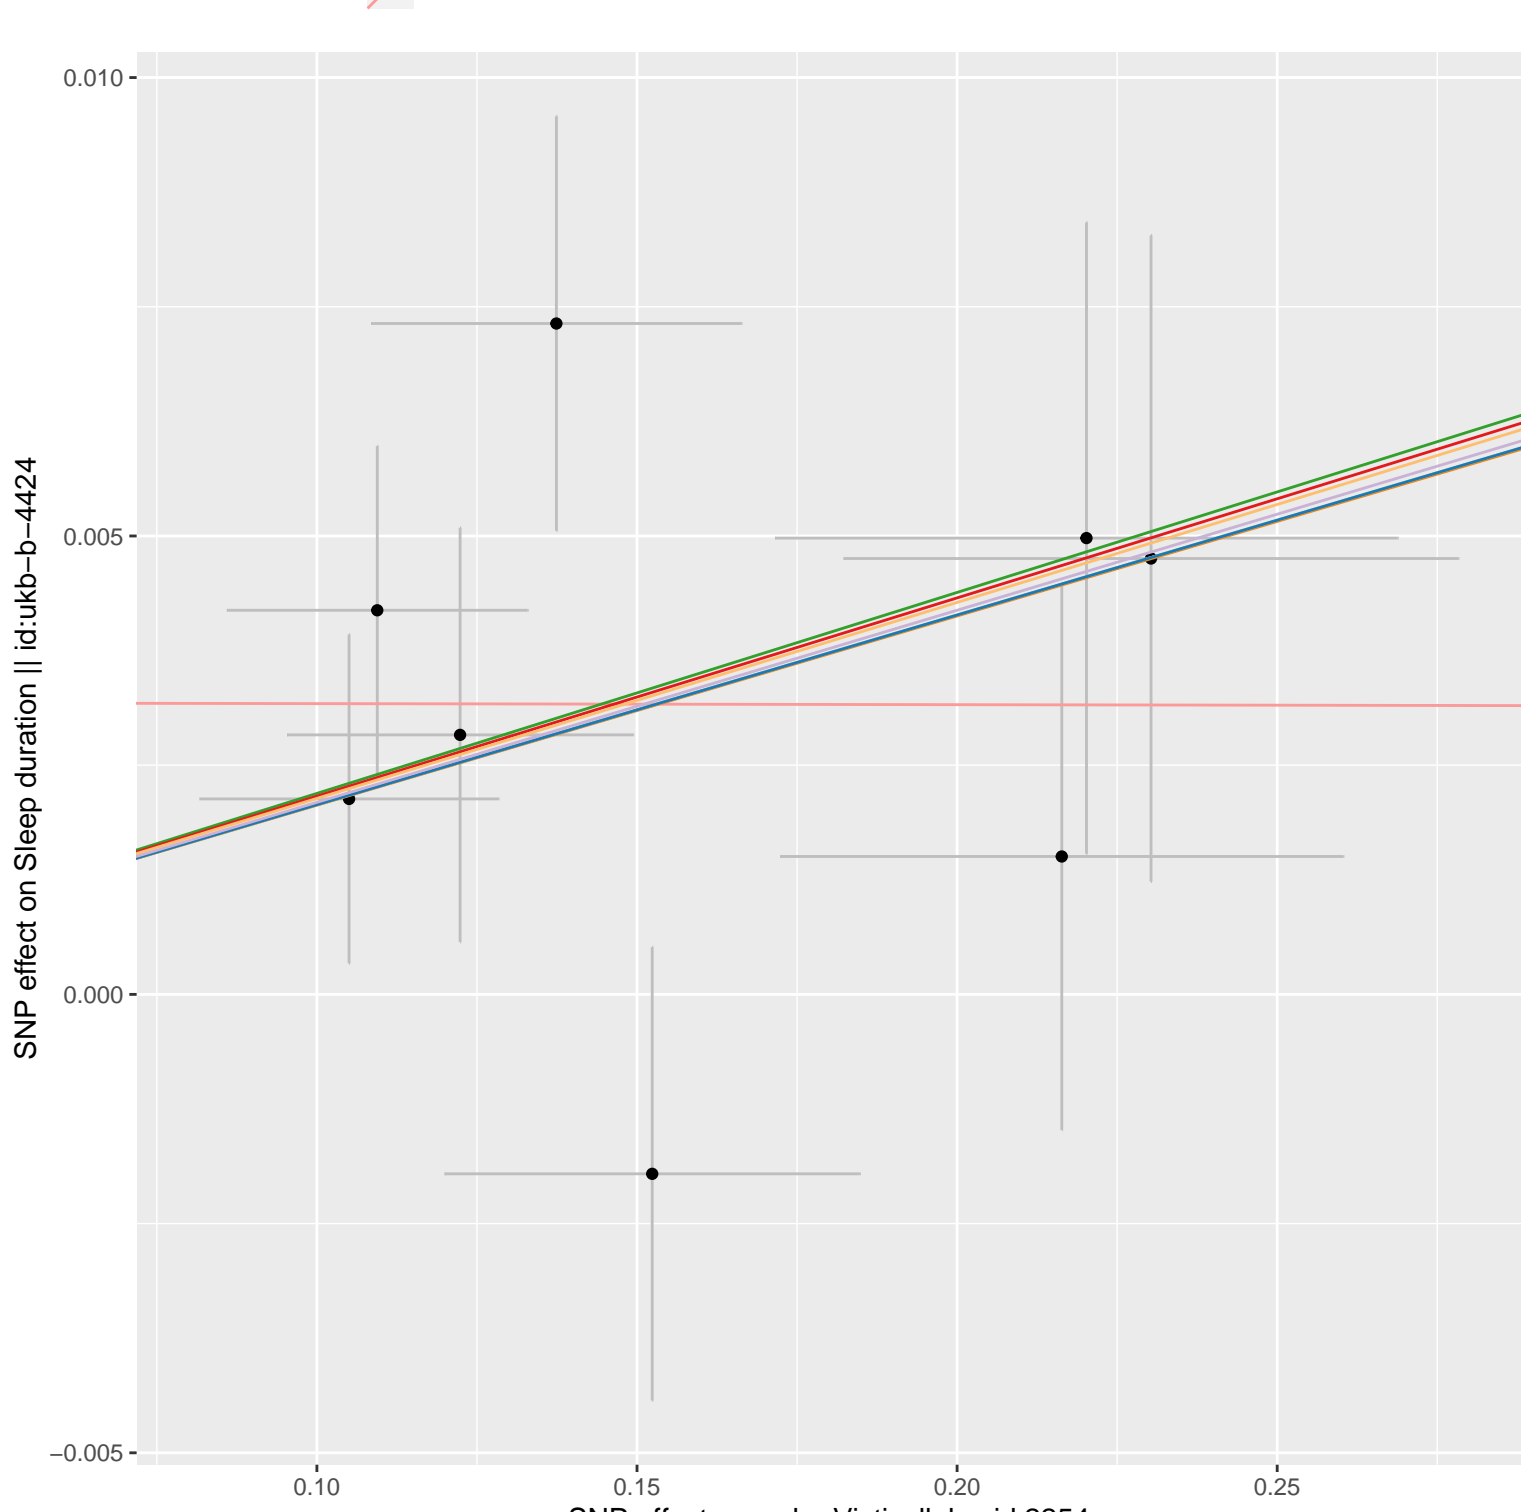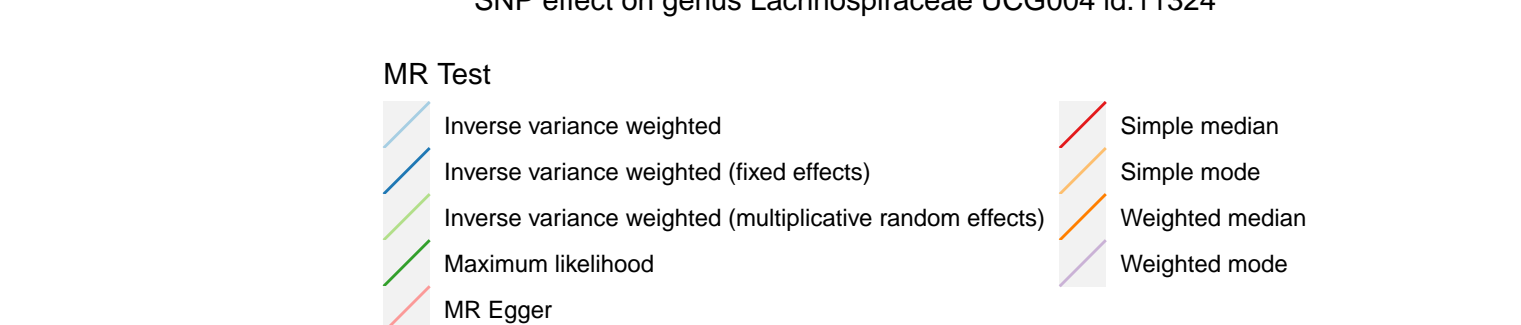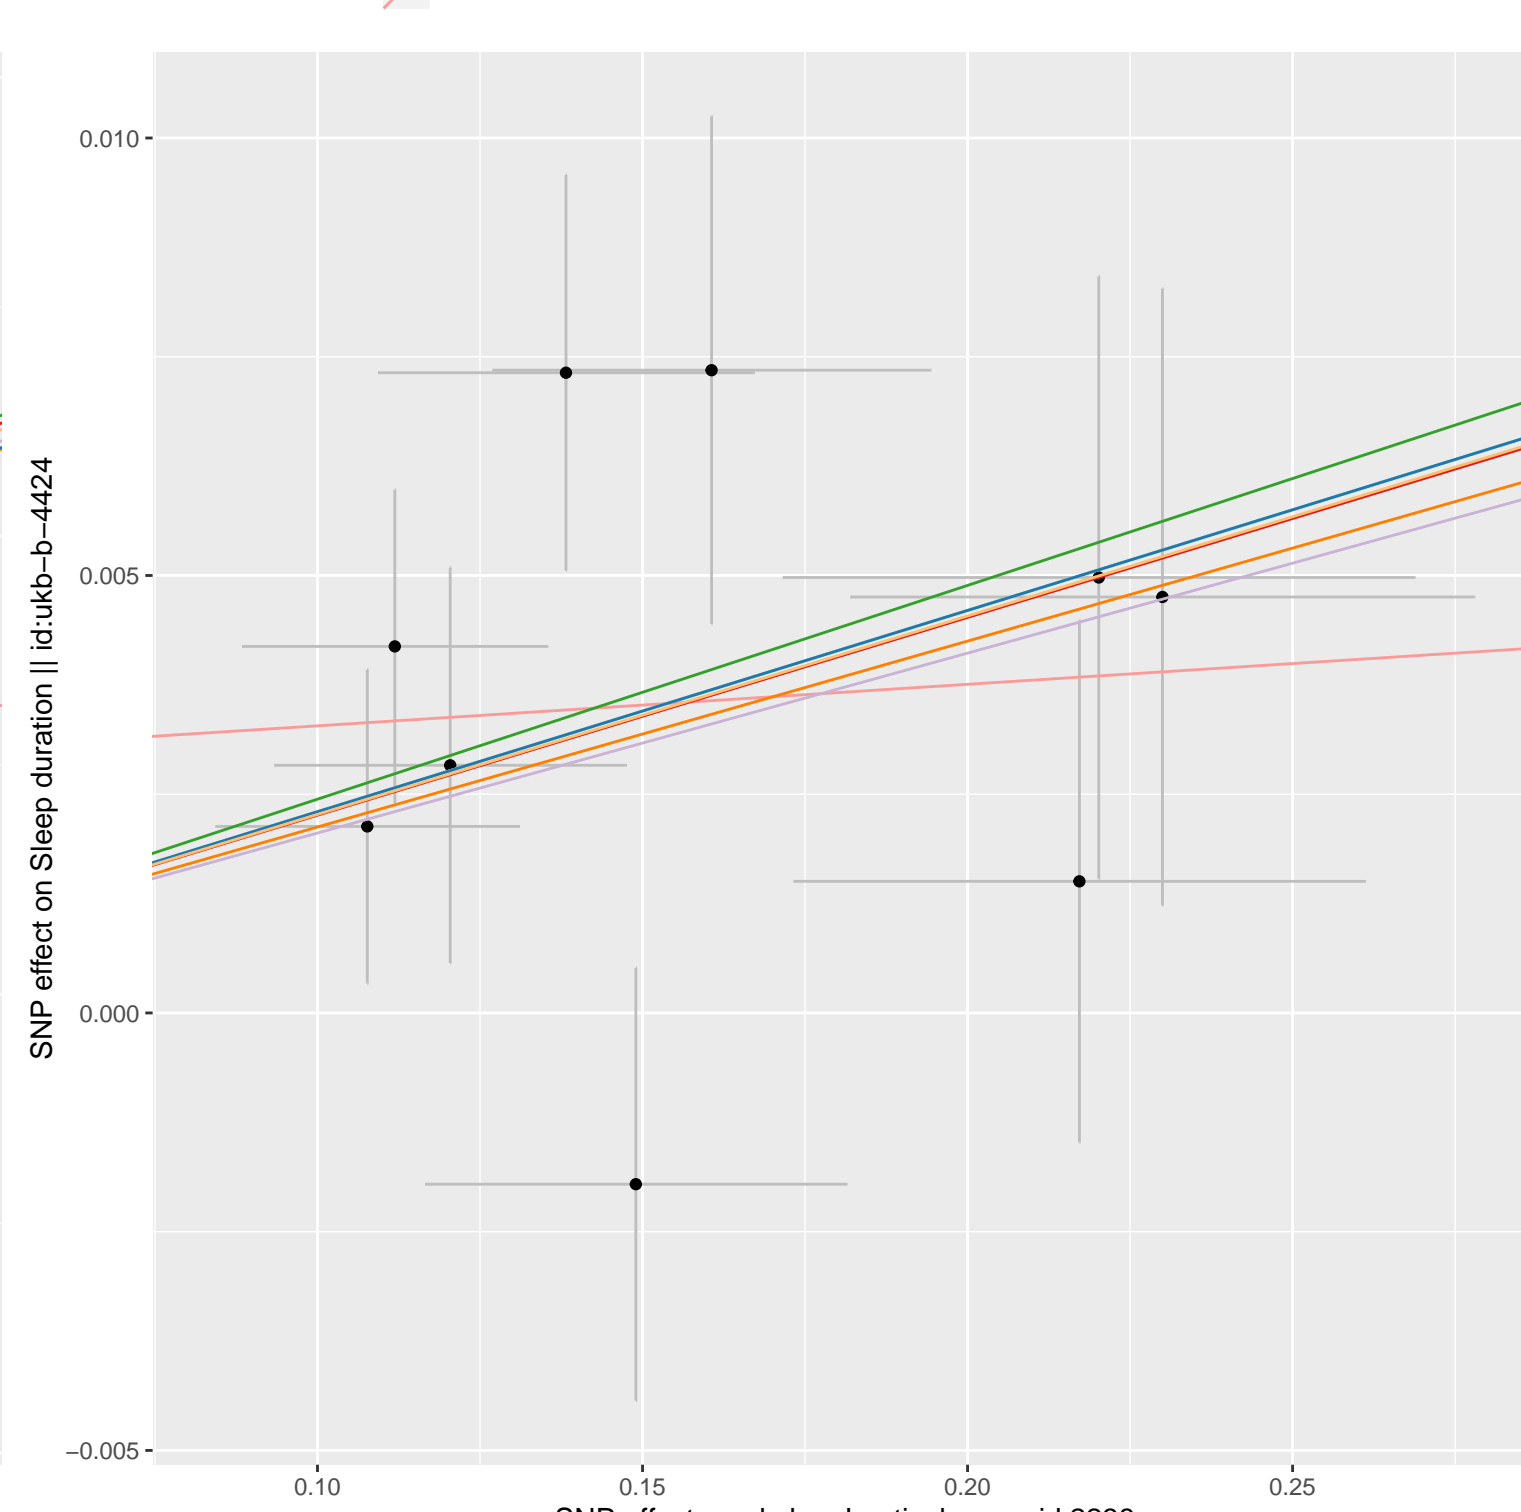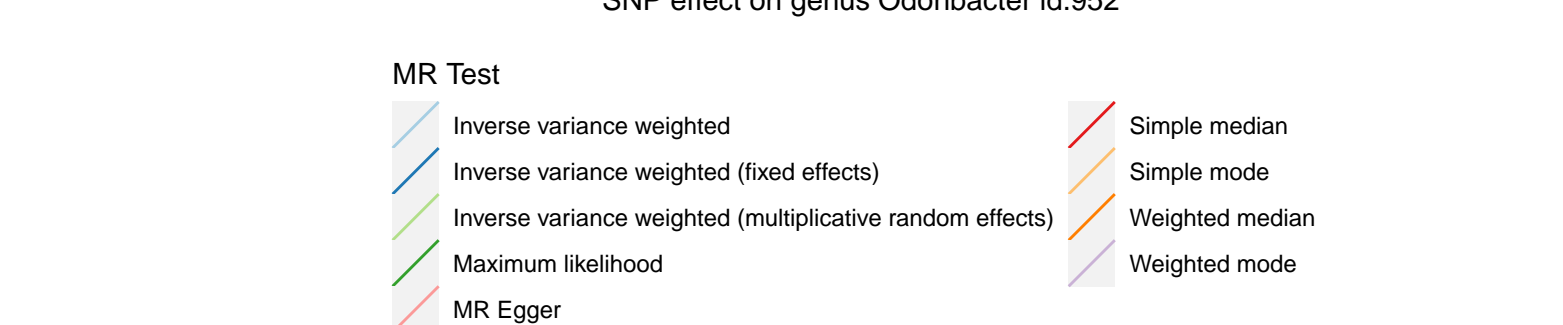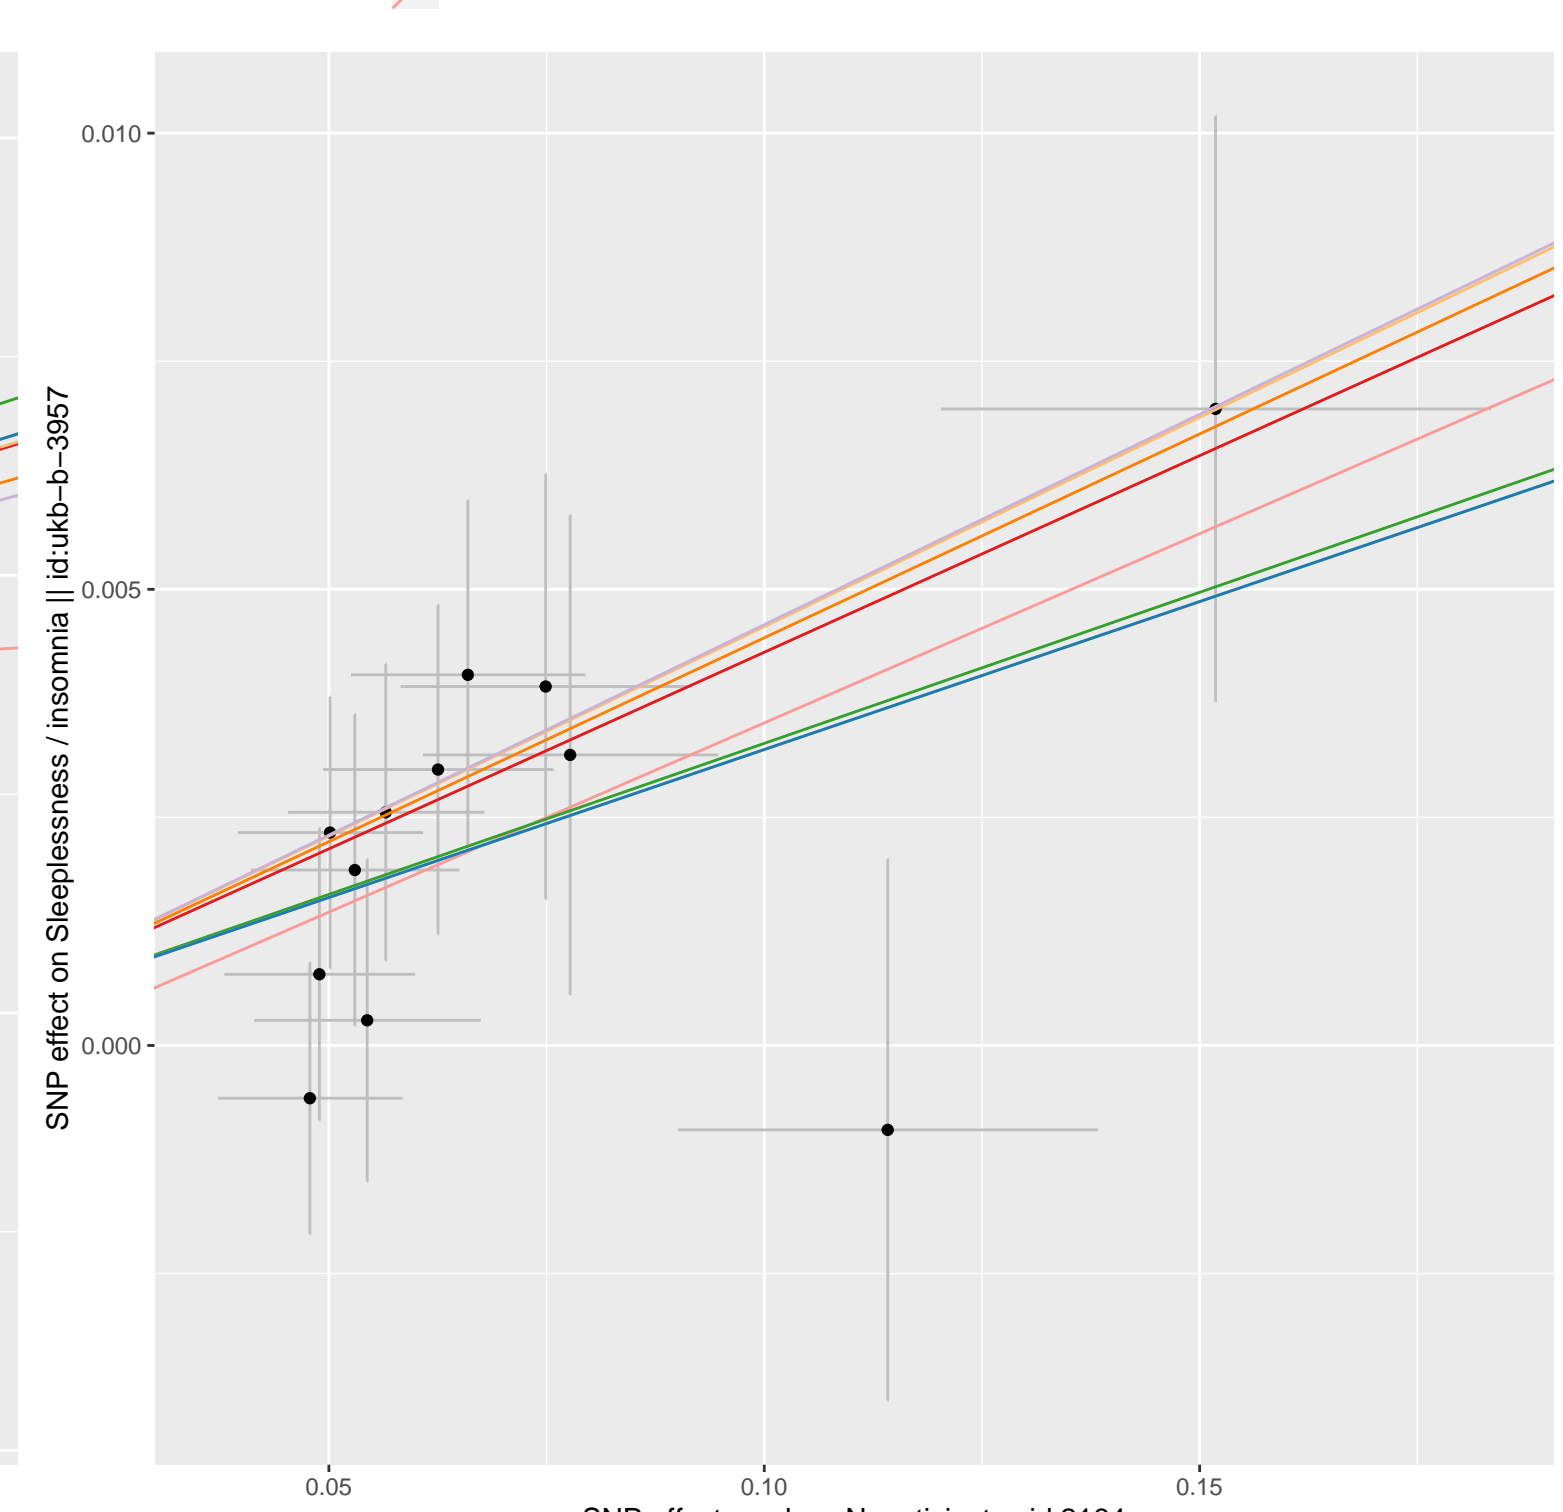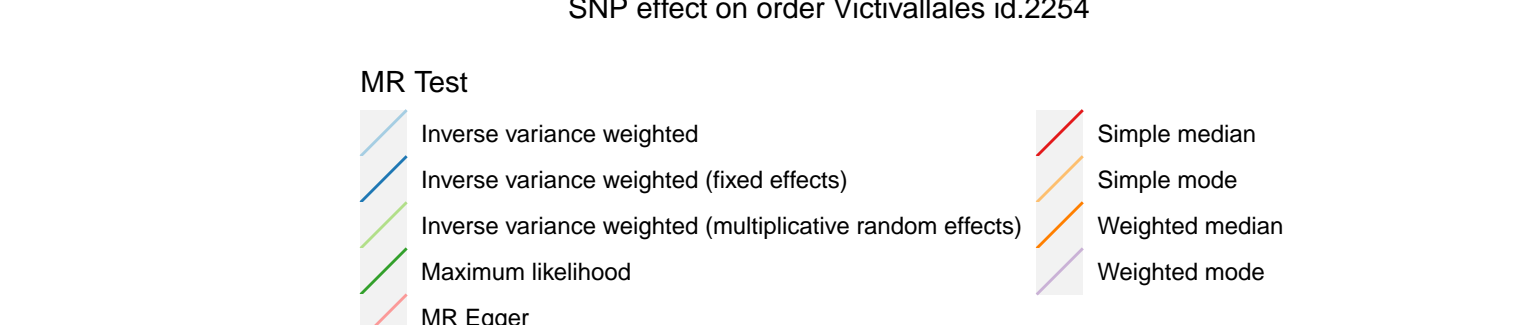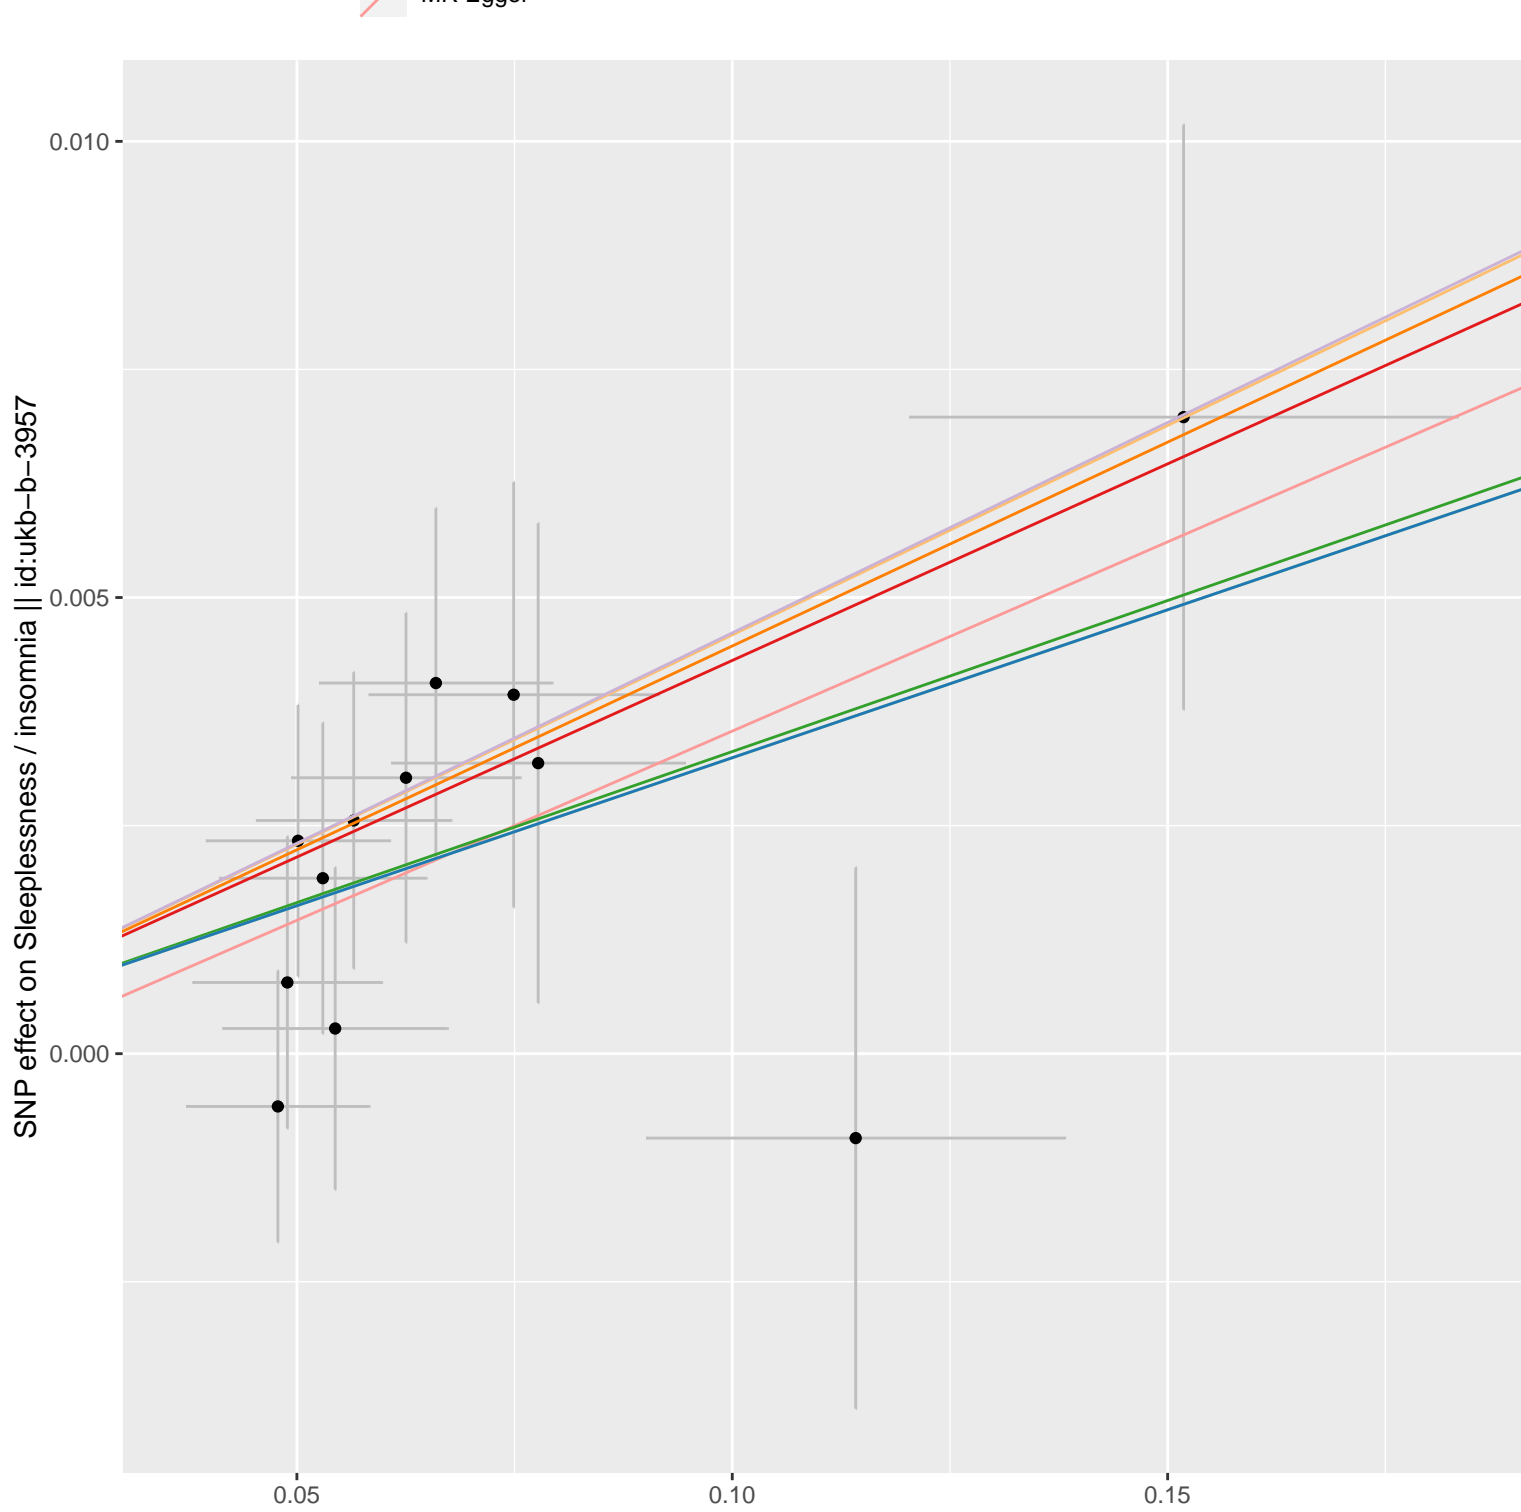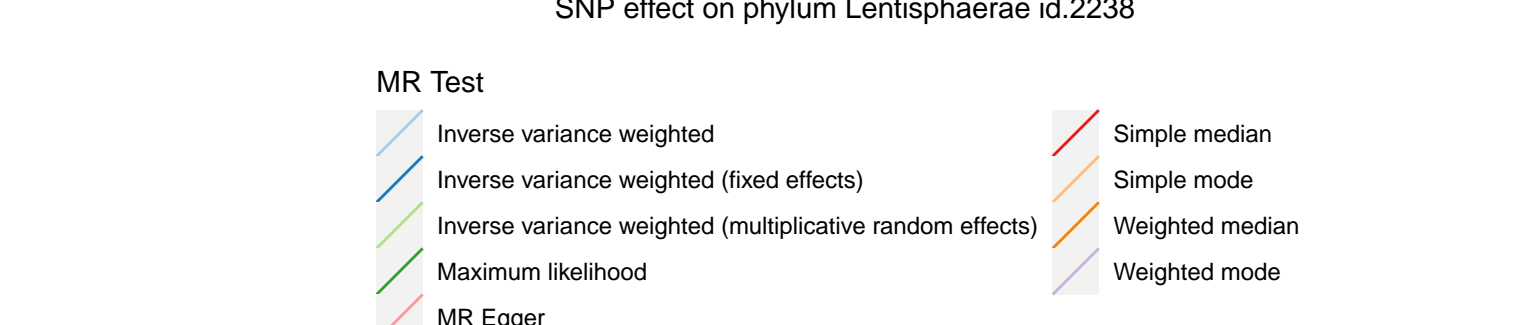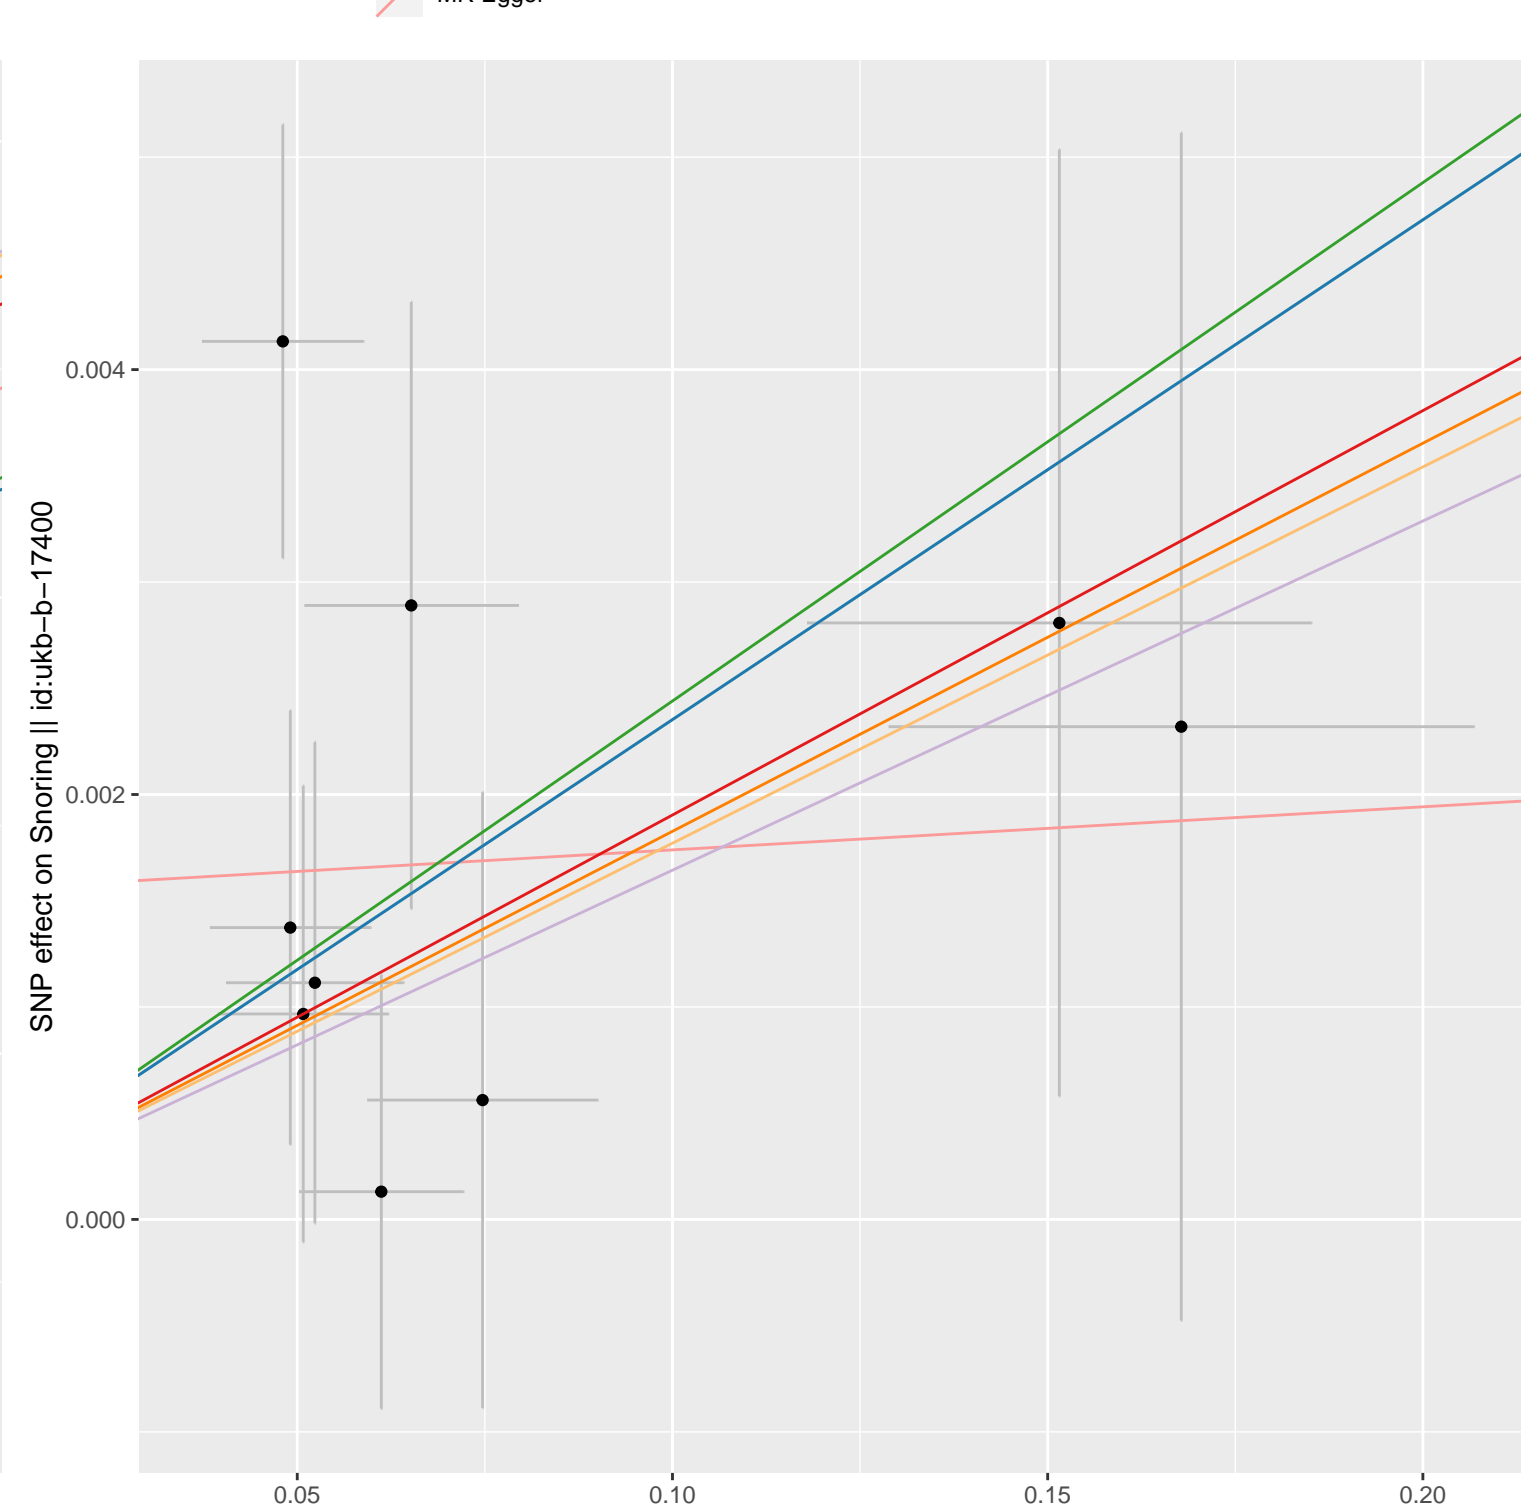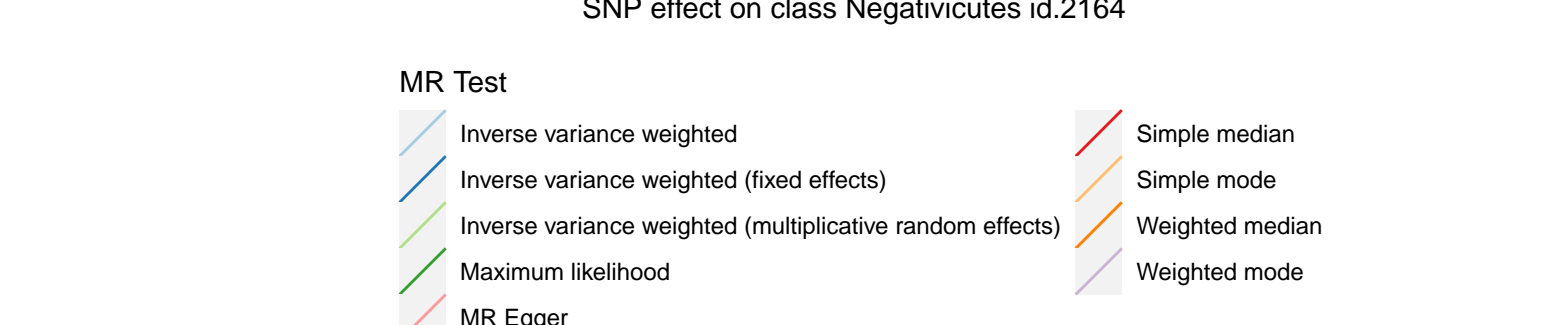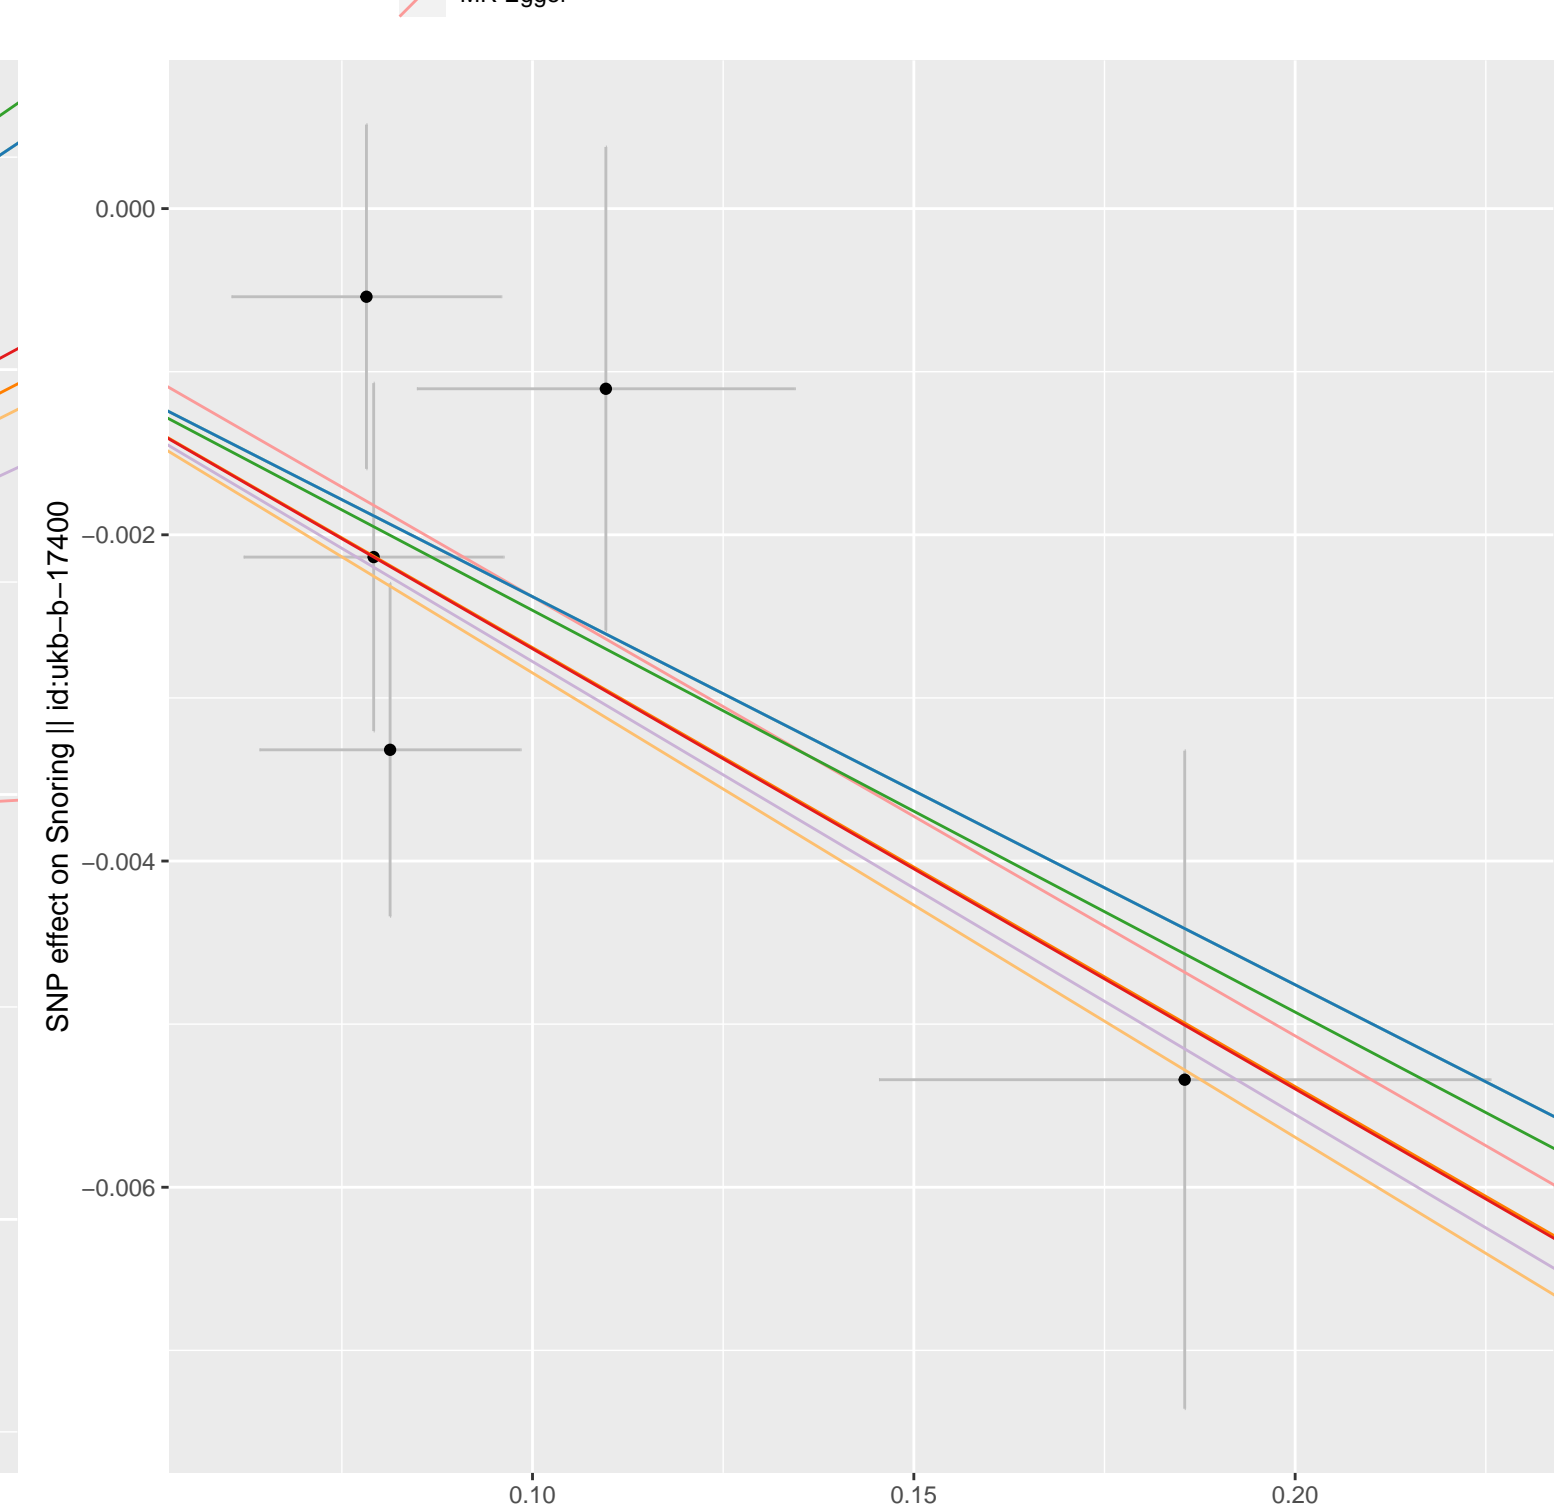

Supplement: s1 [file s1]

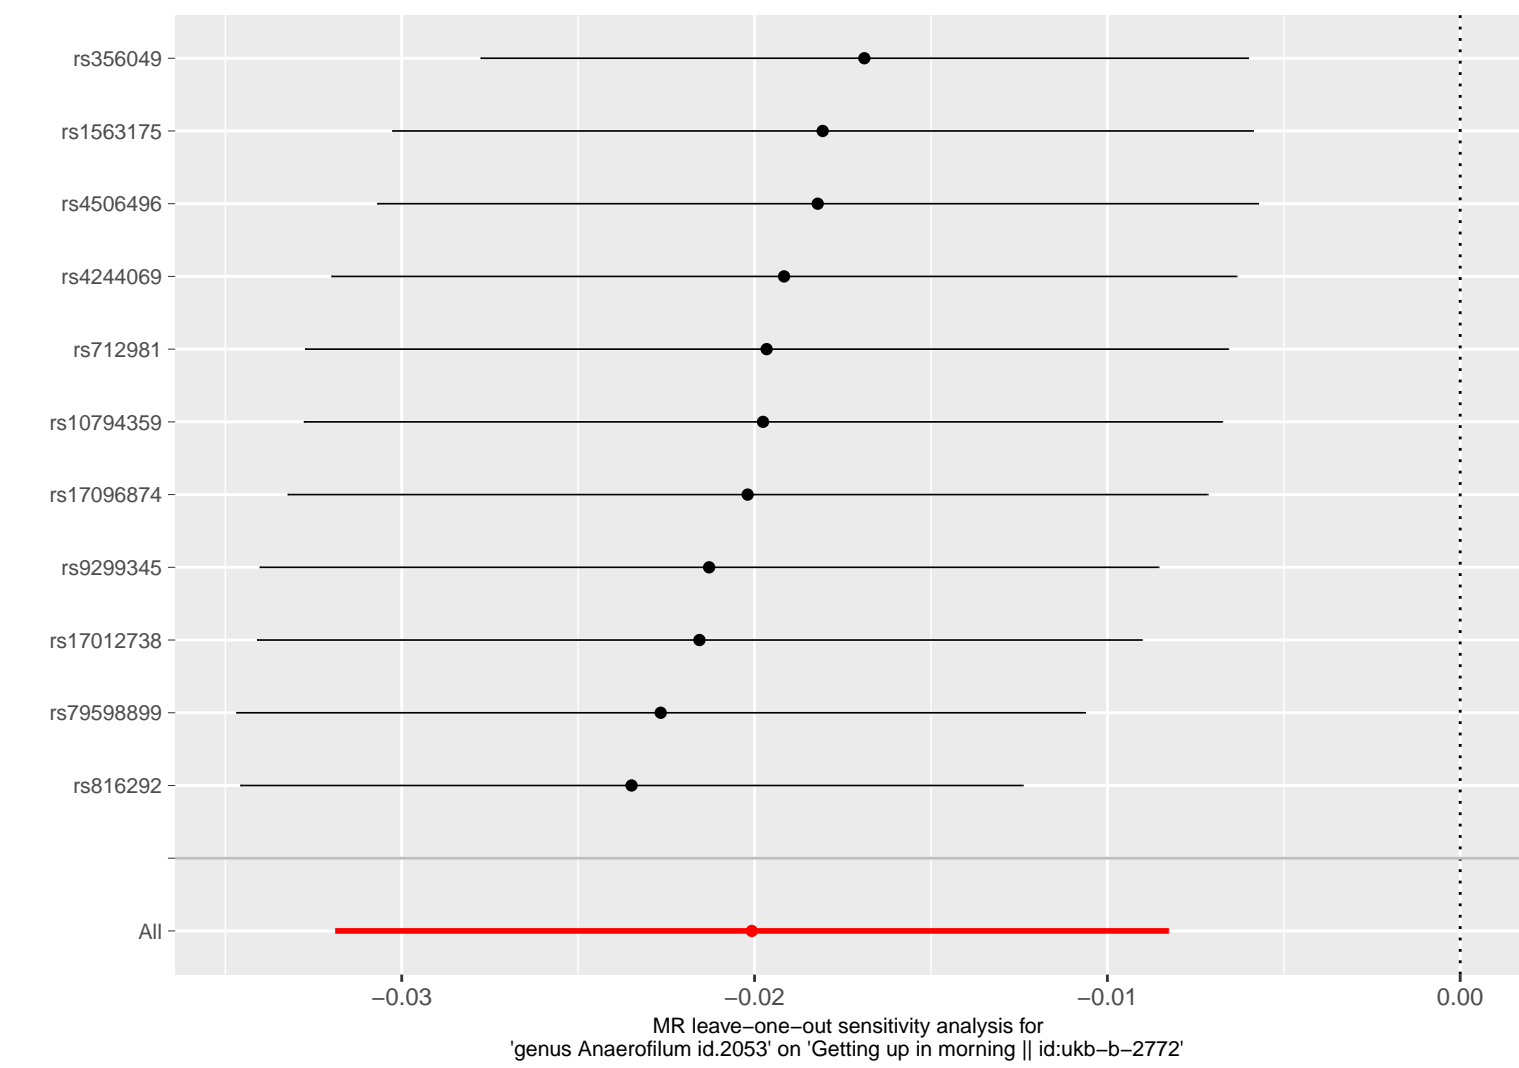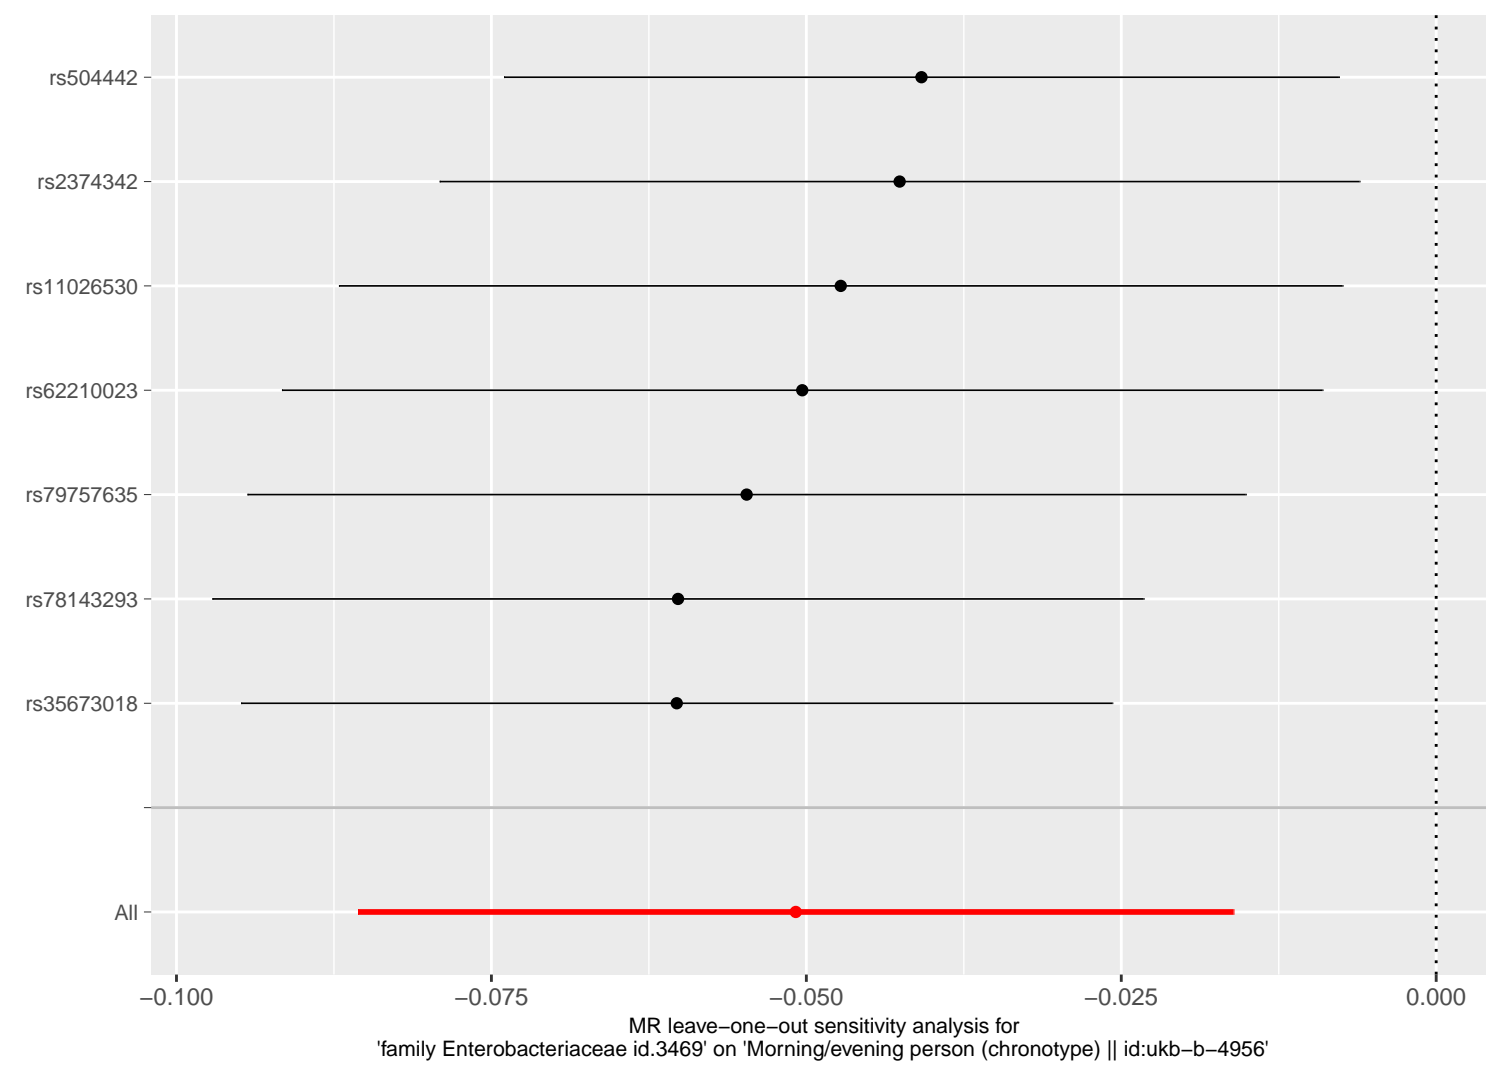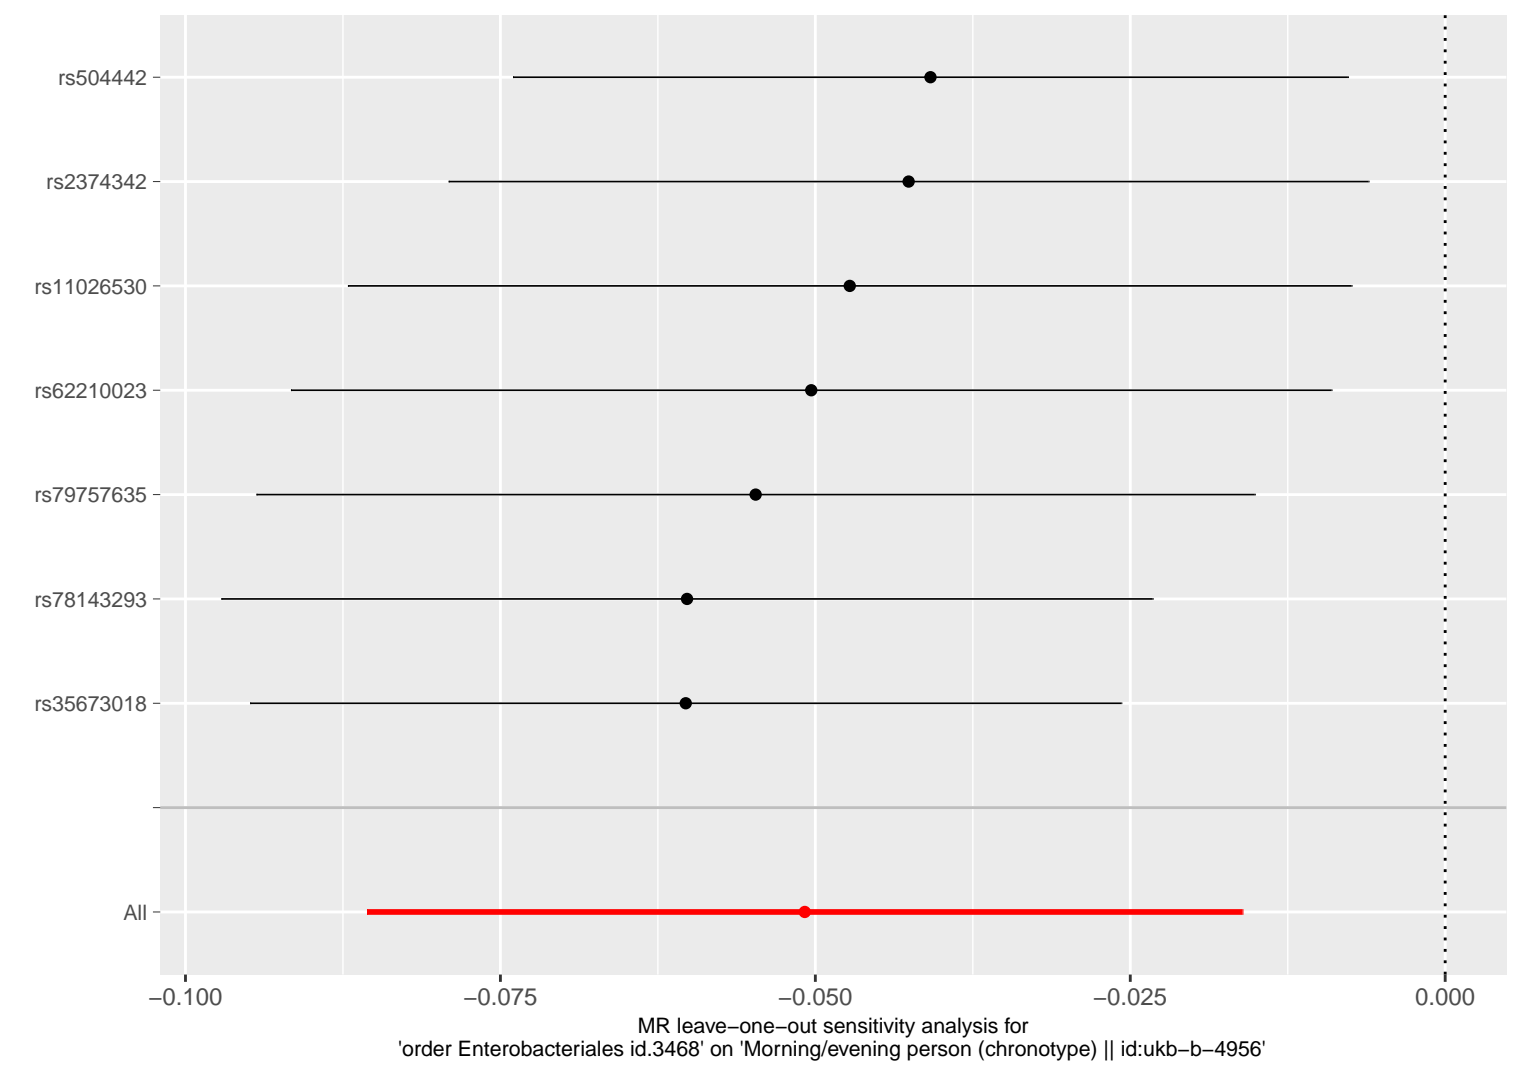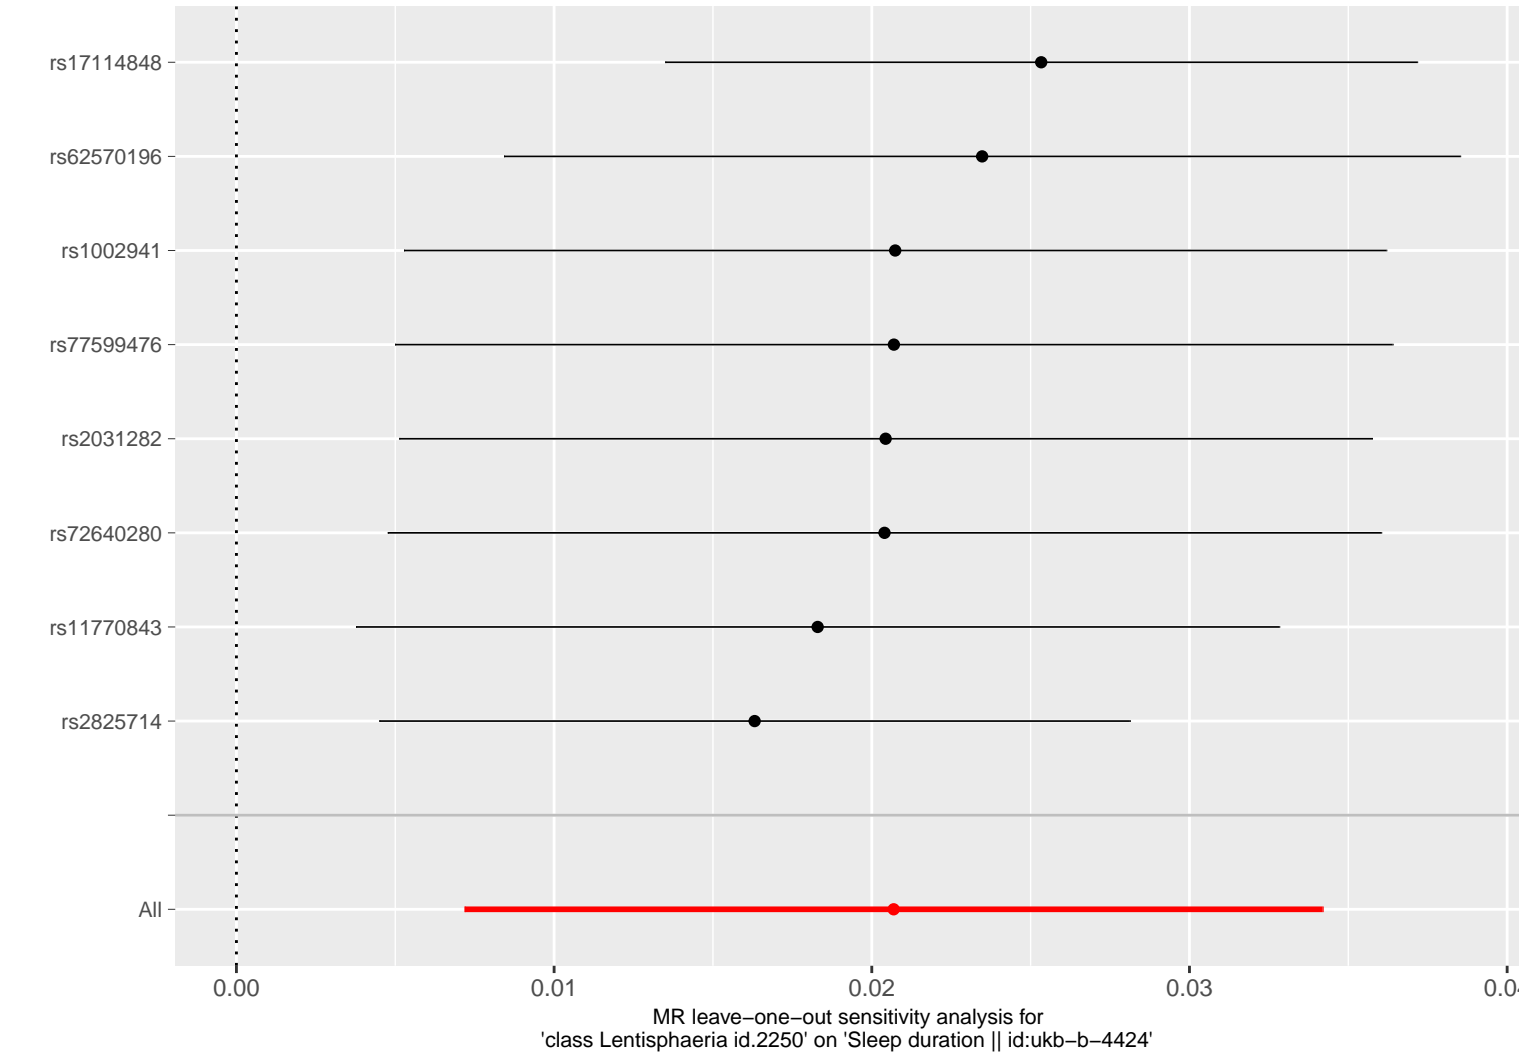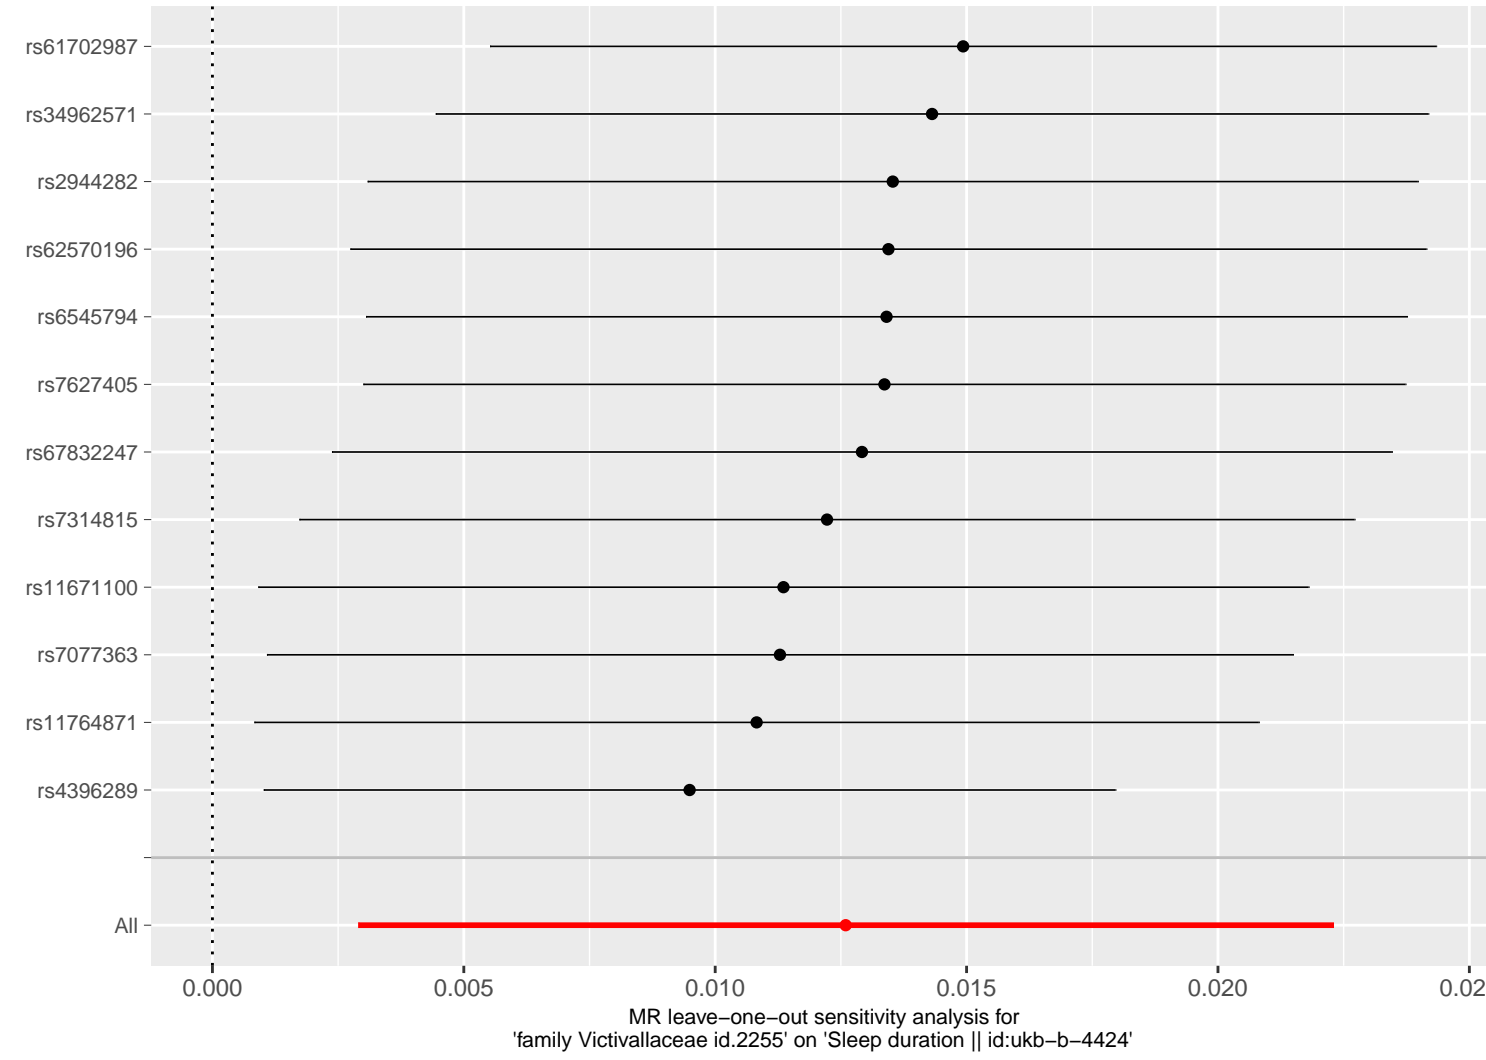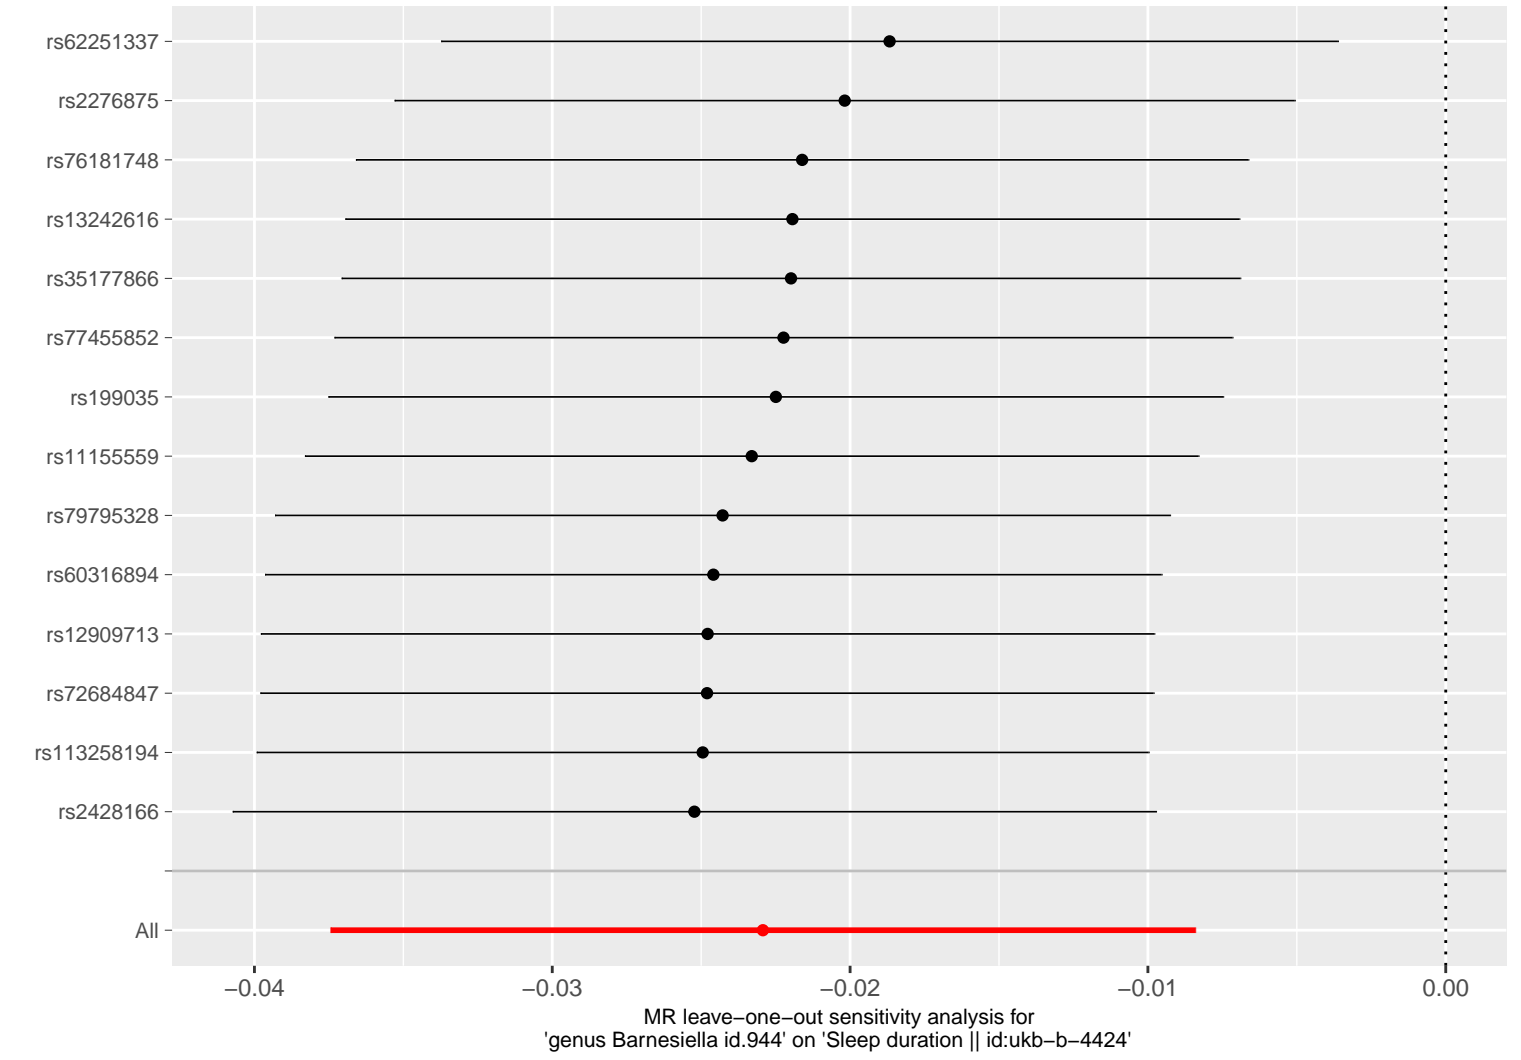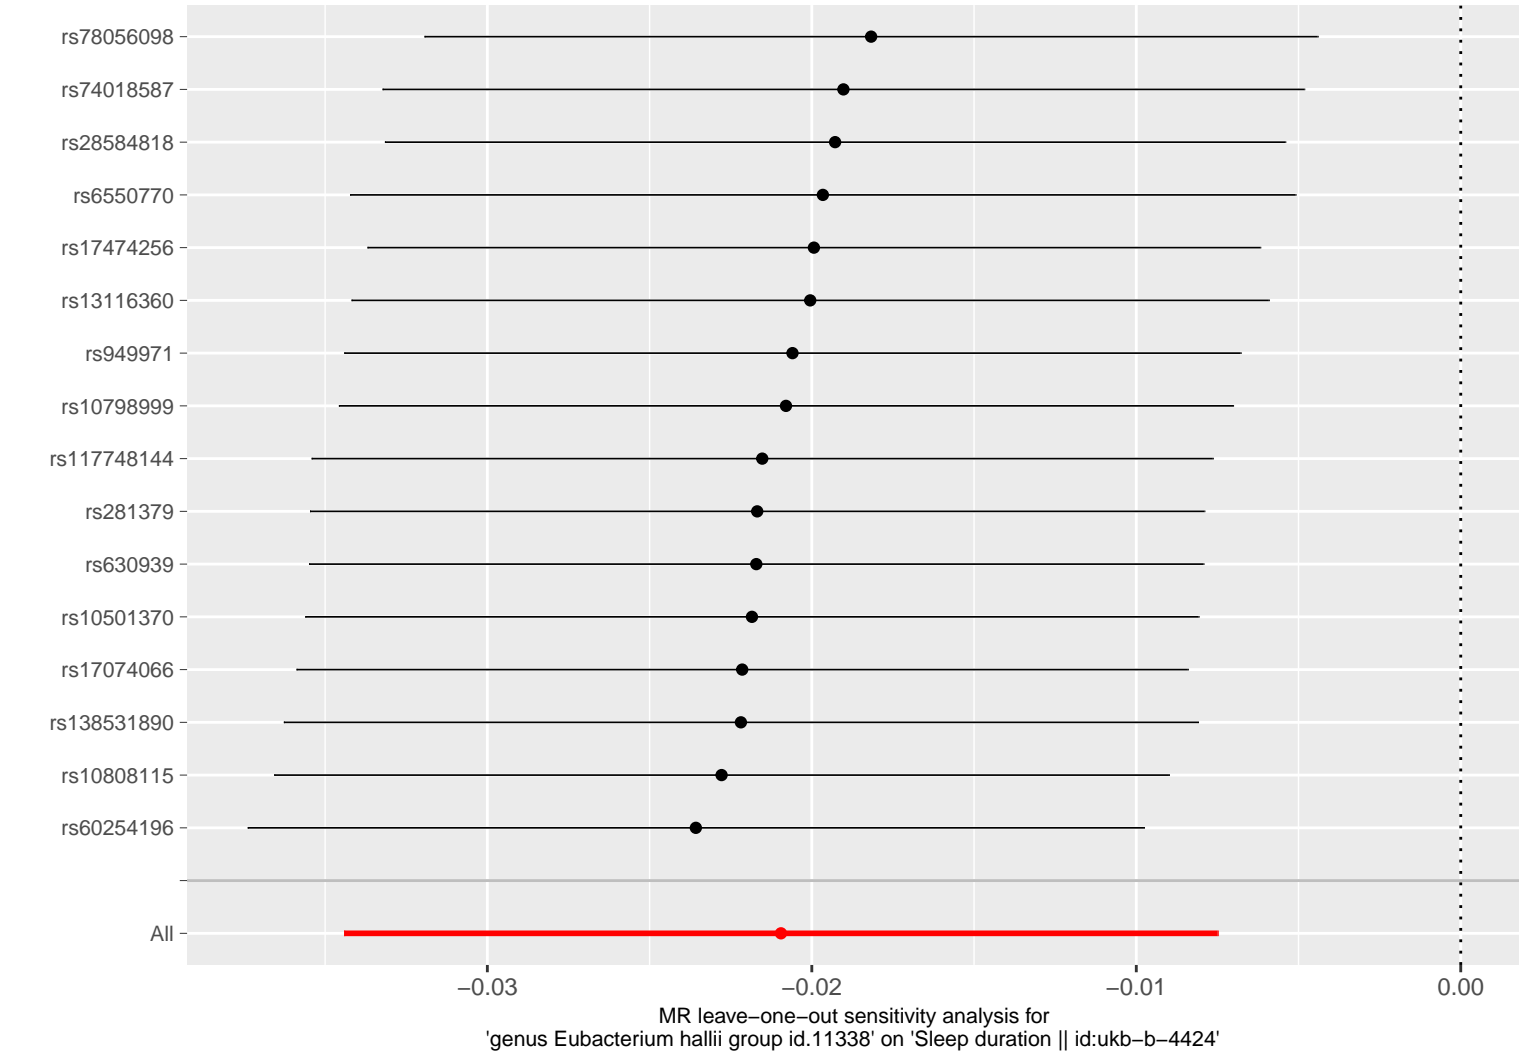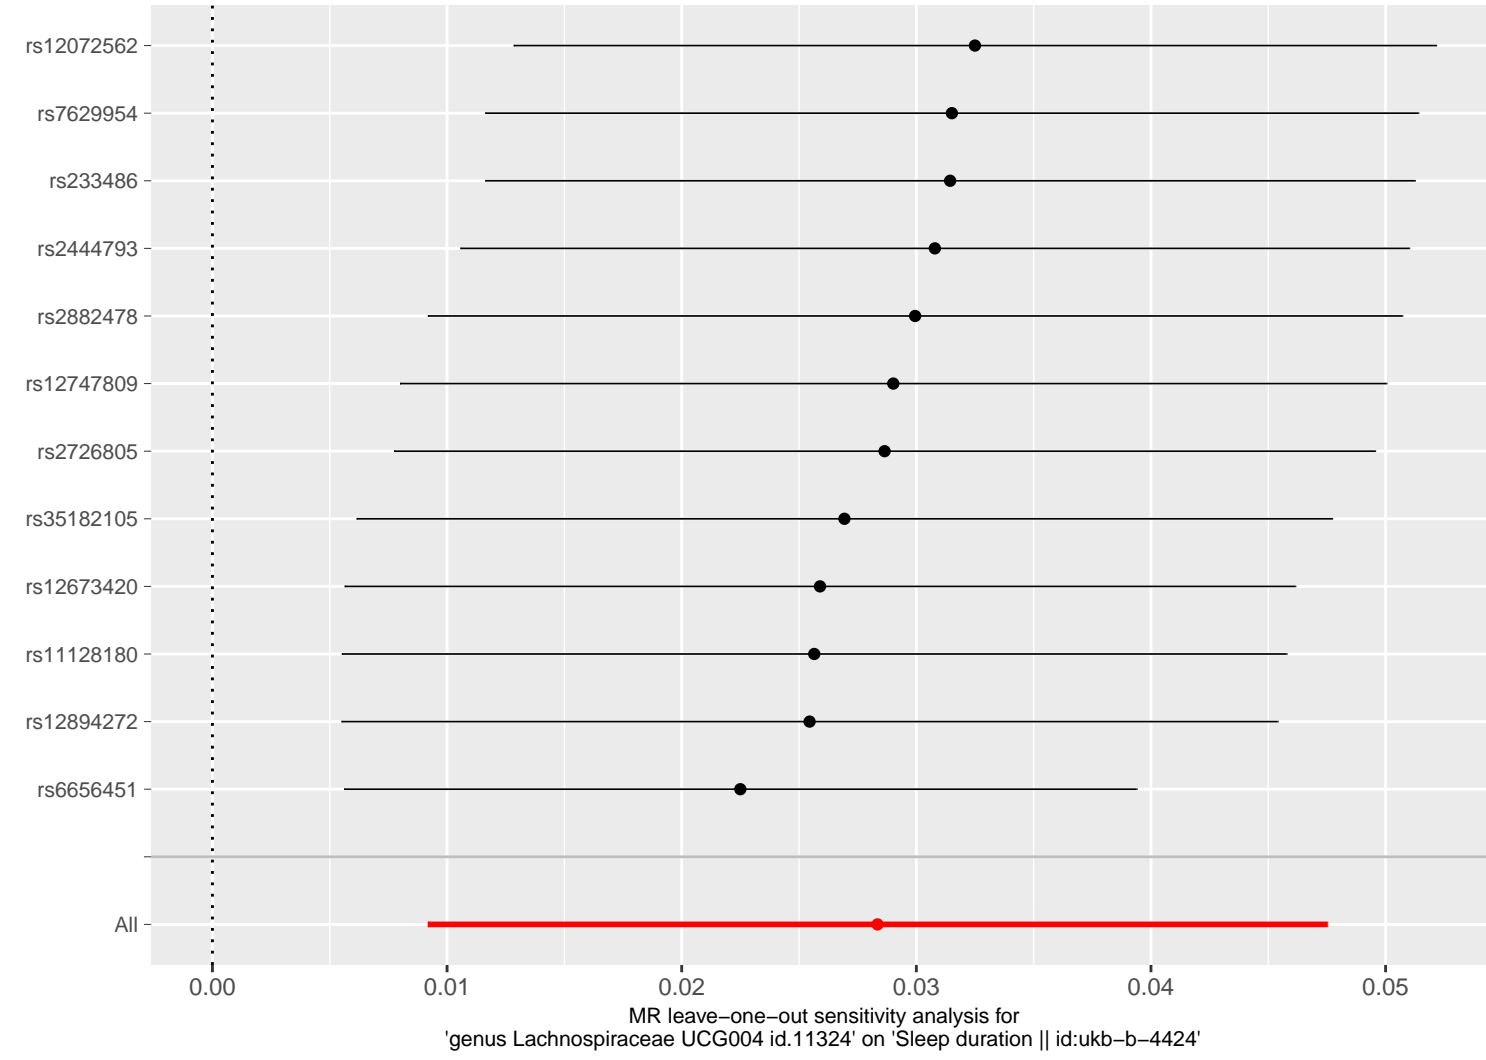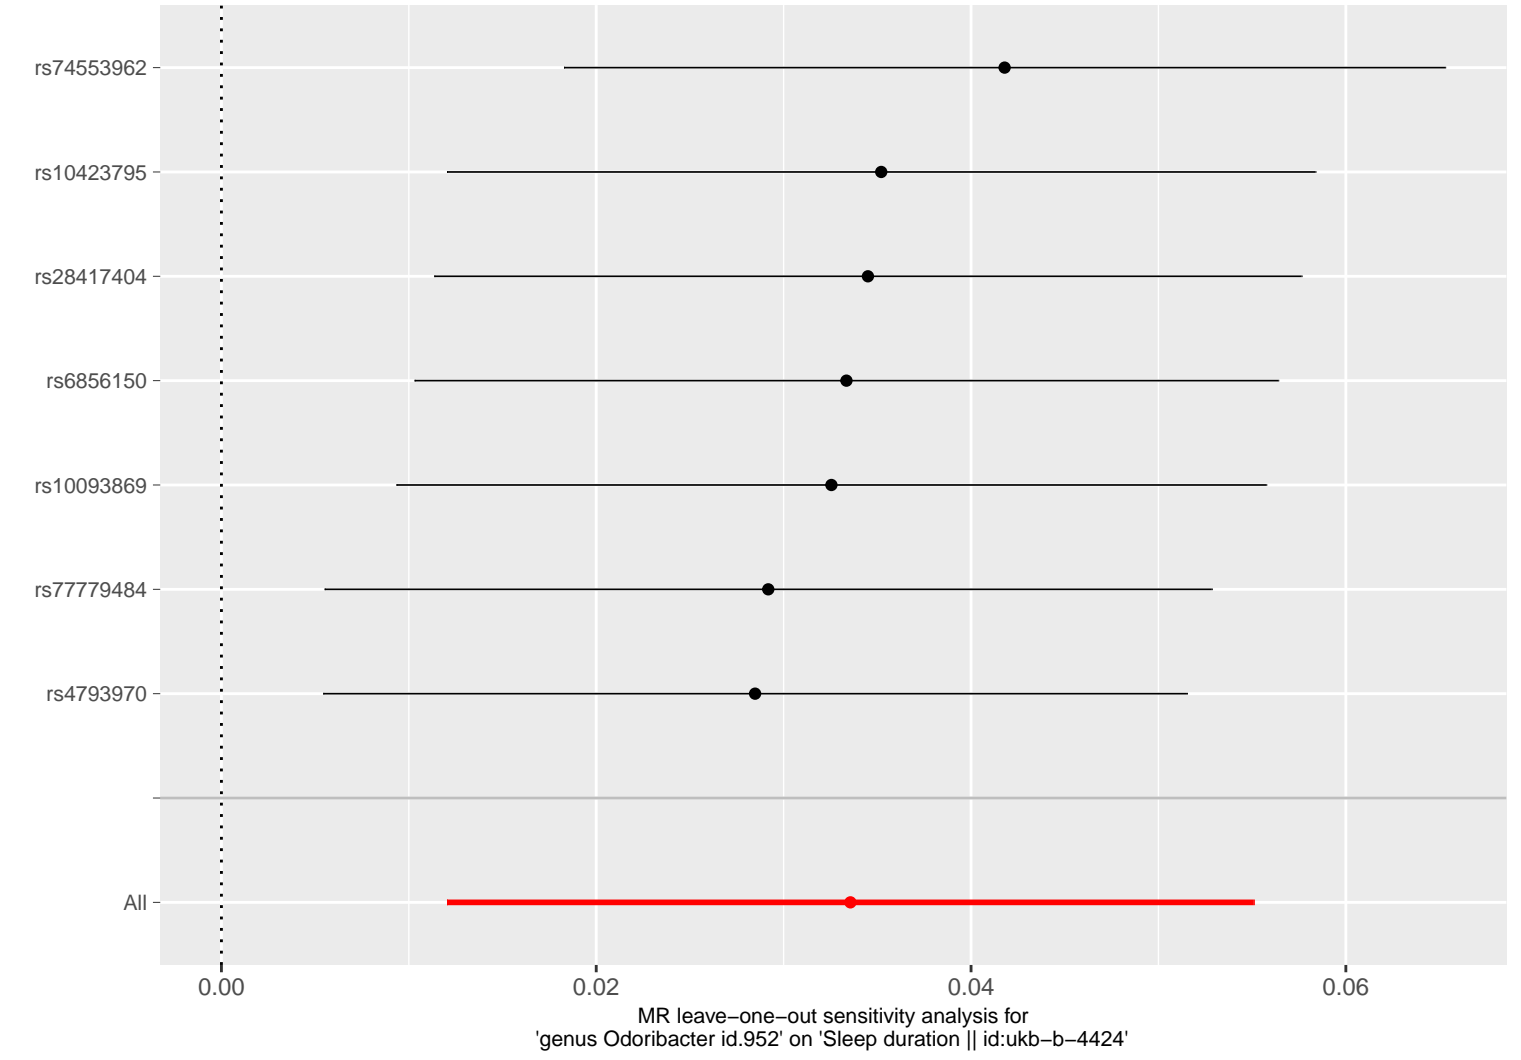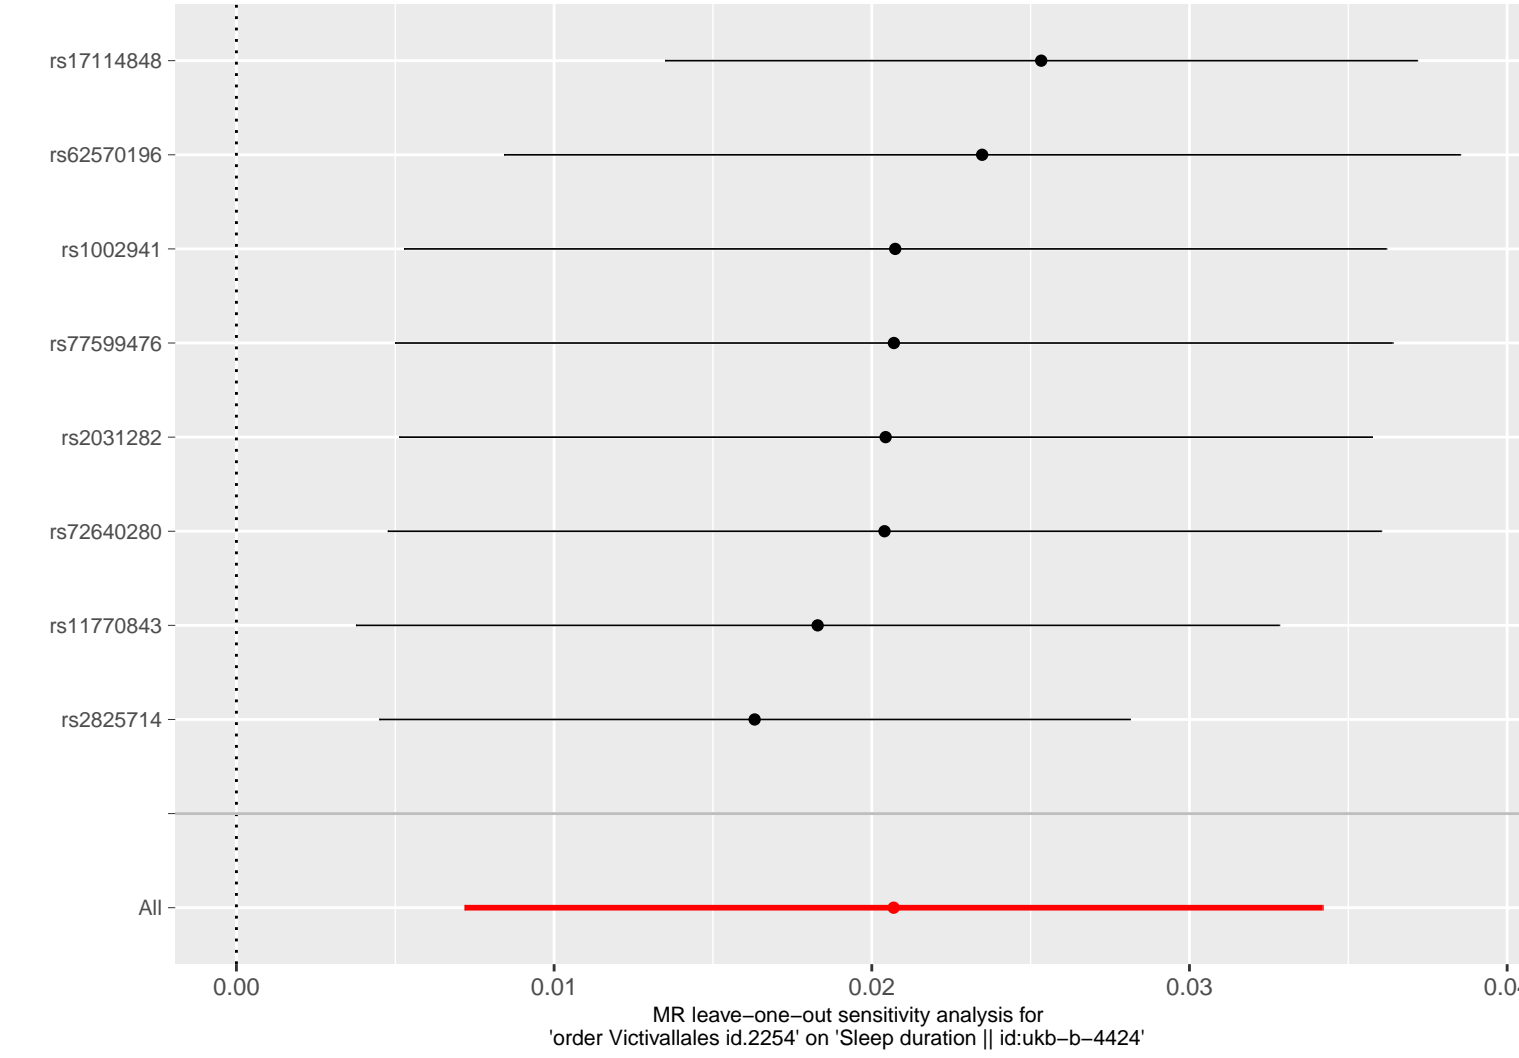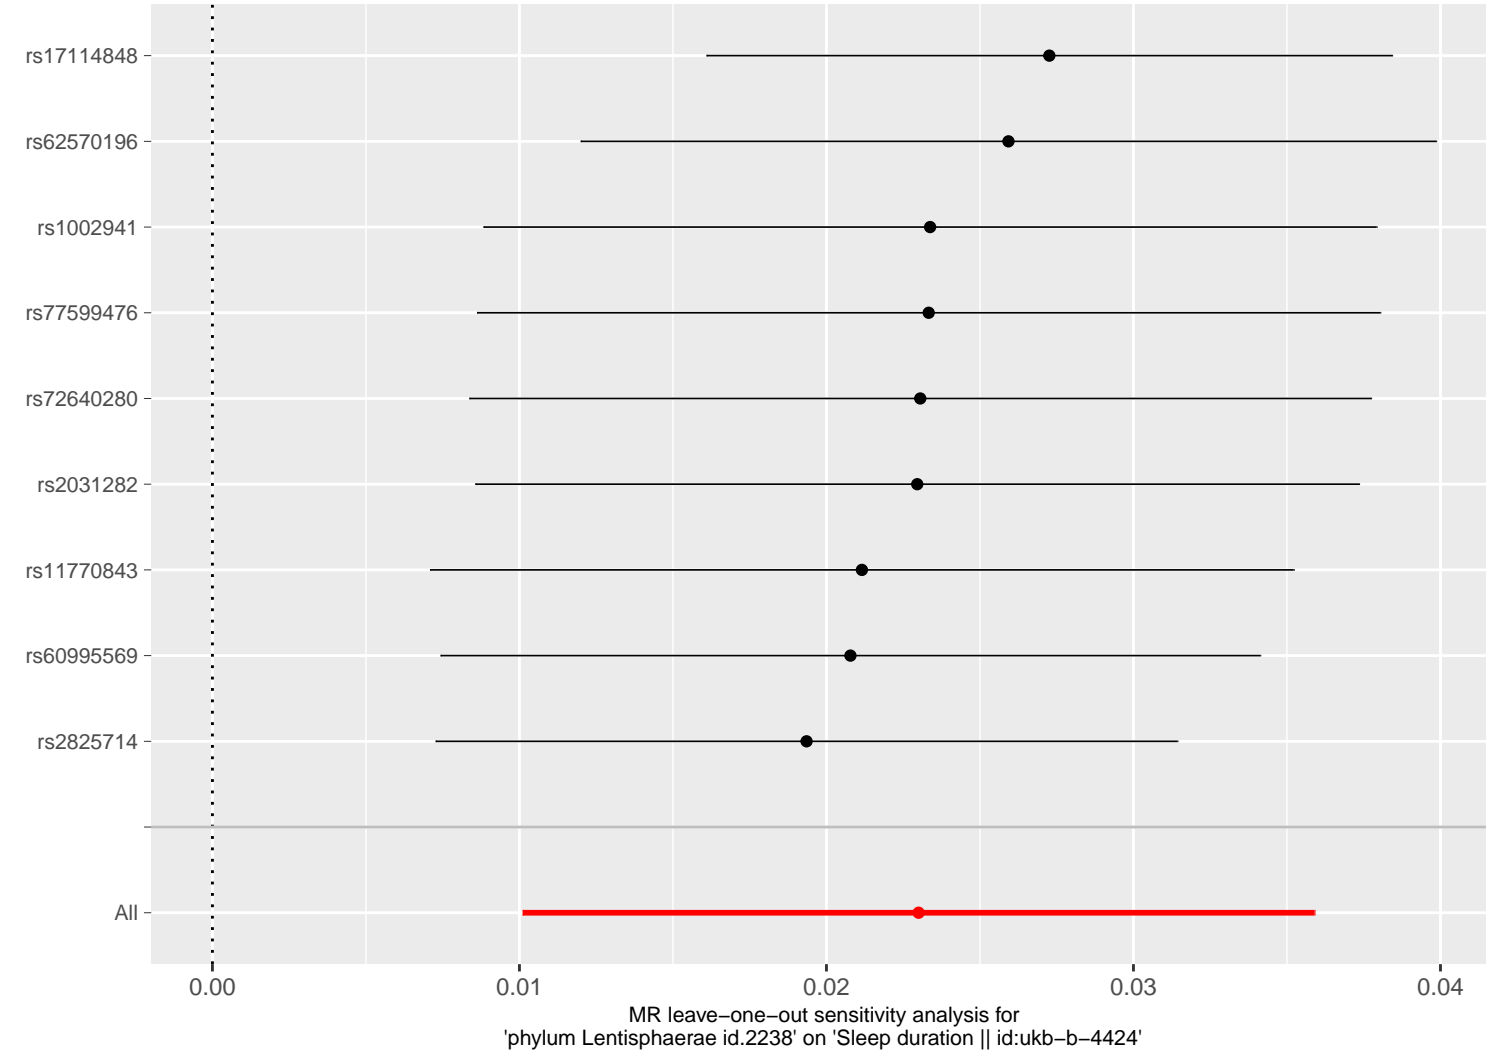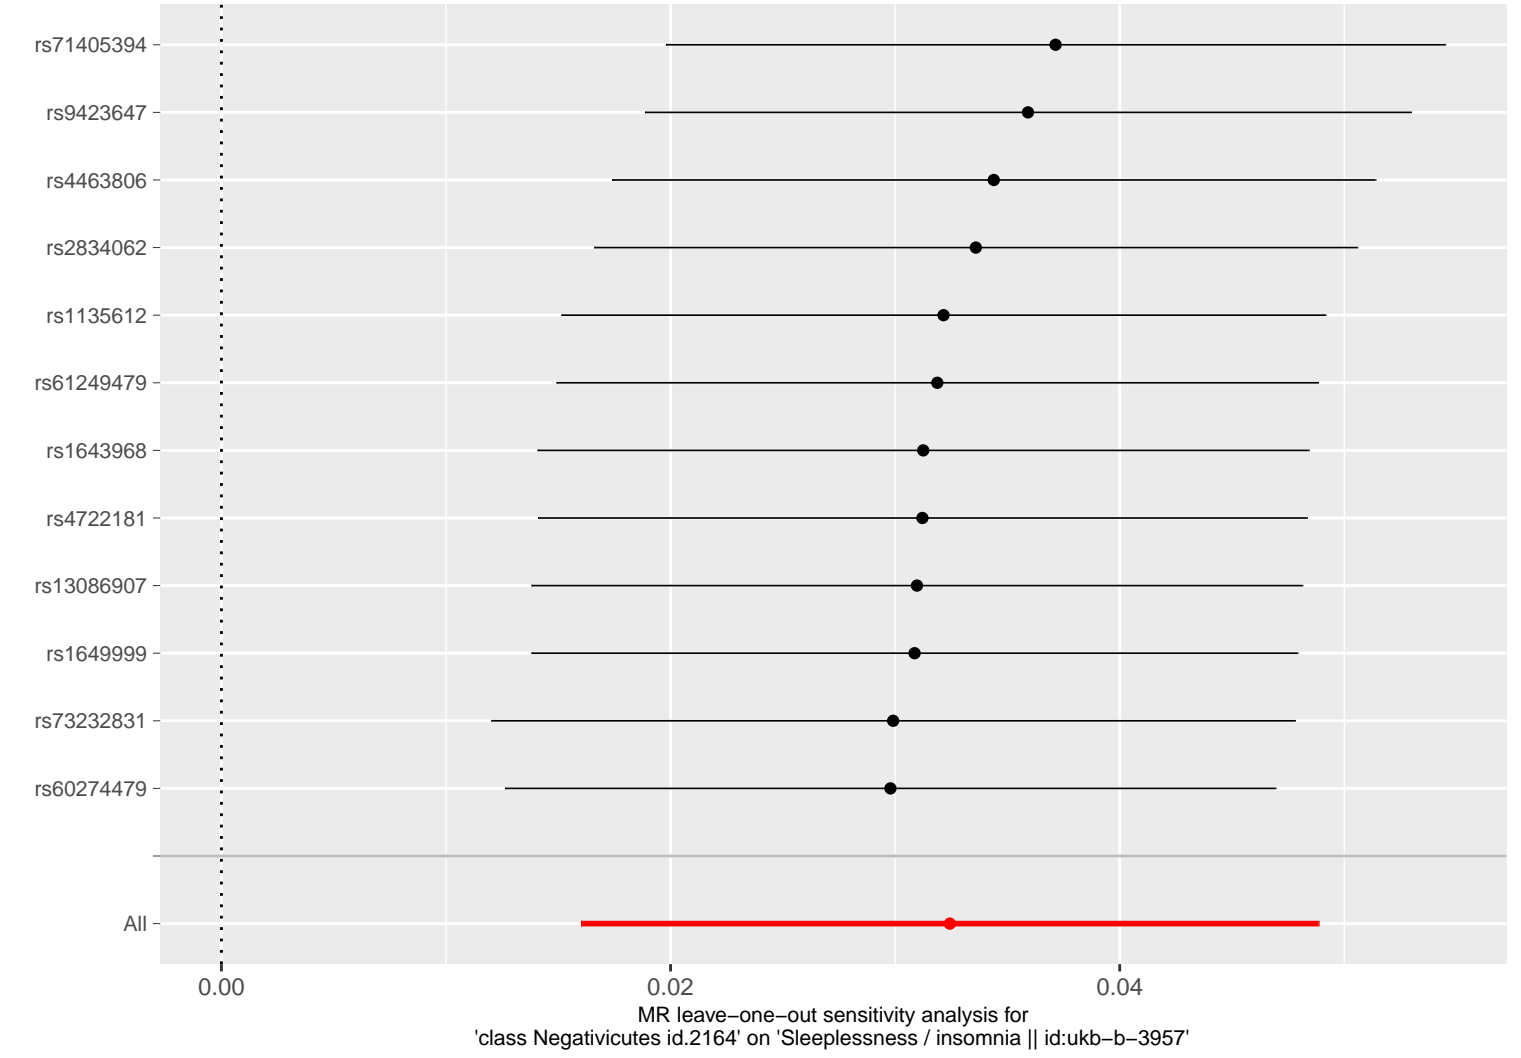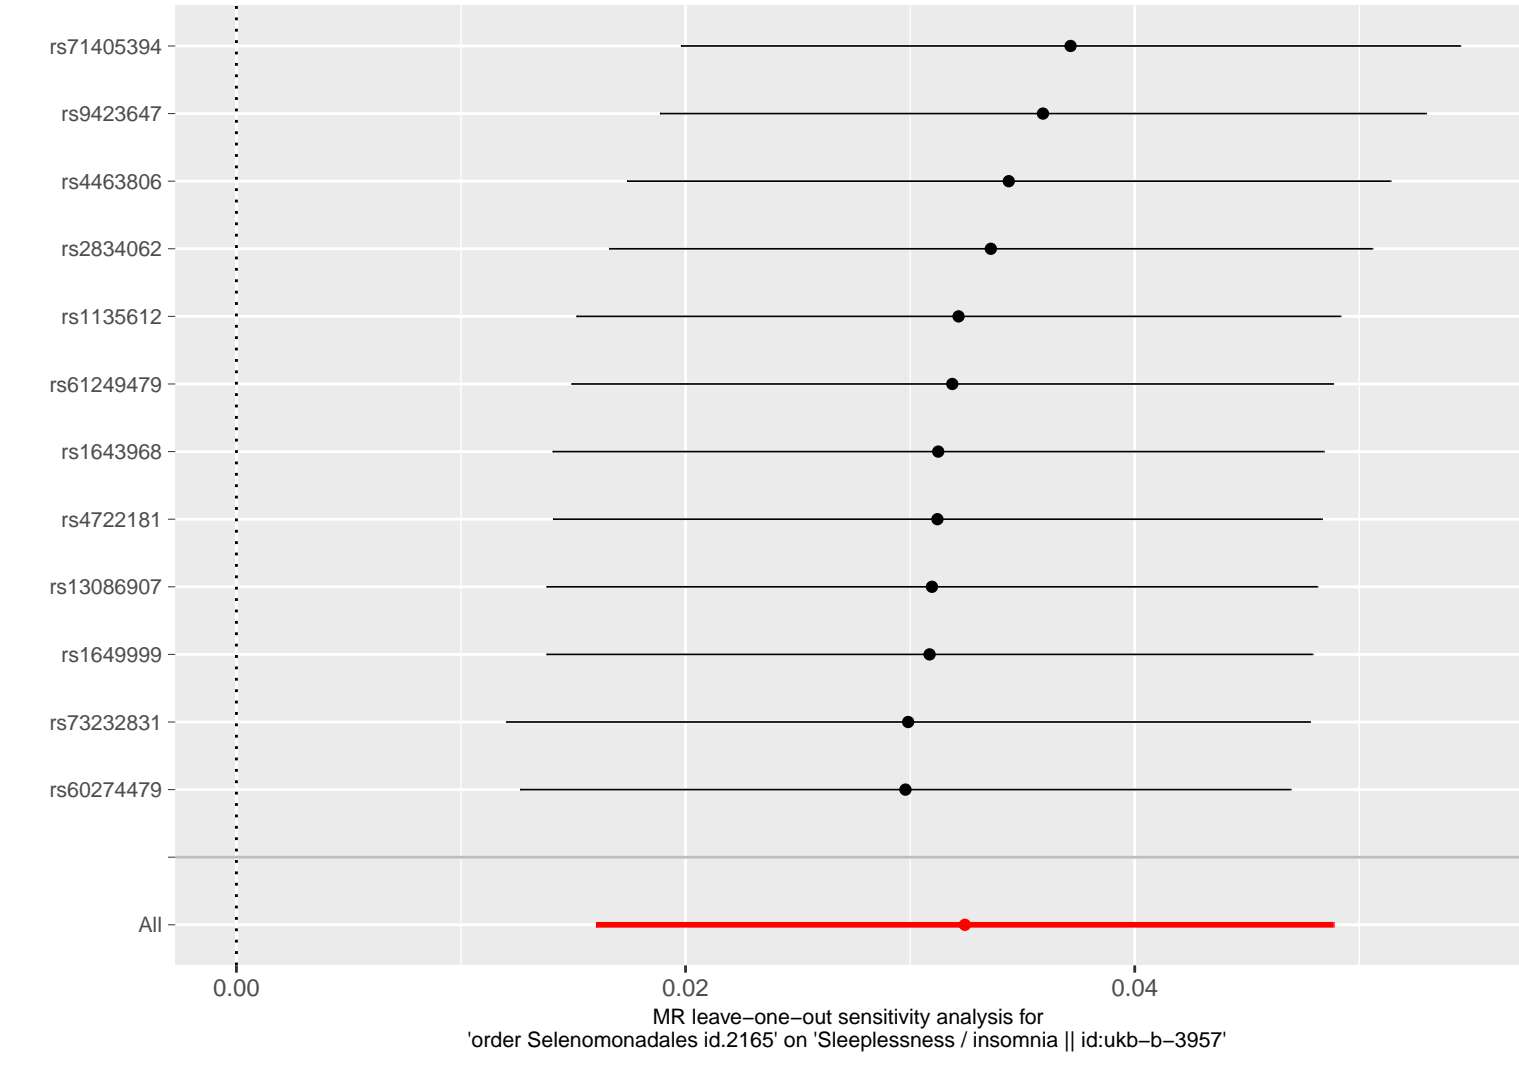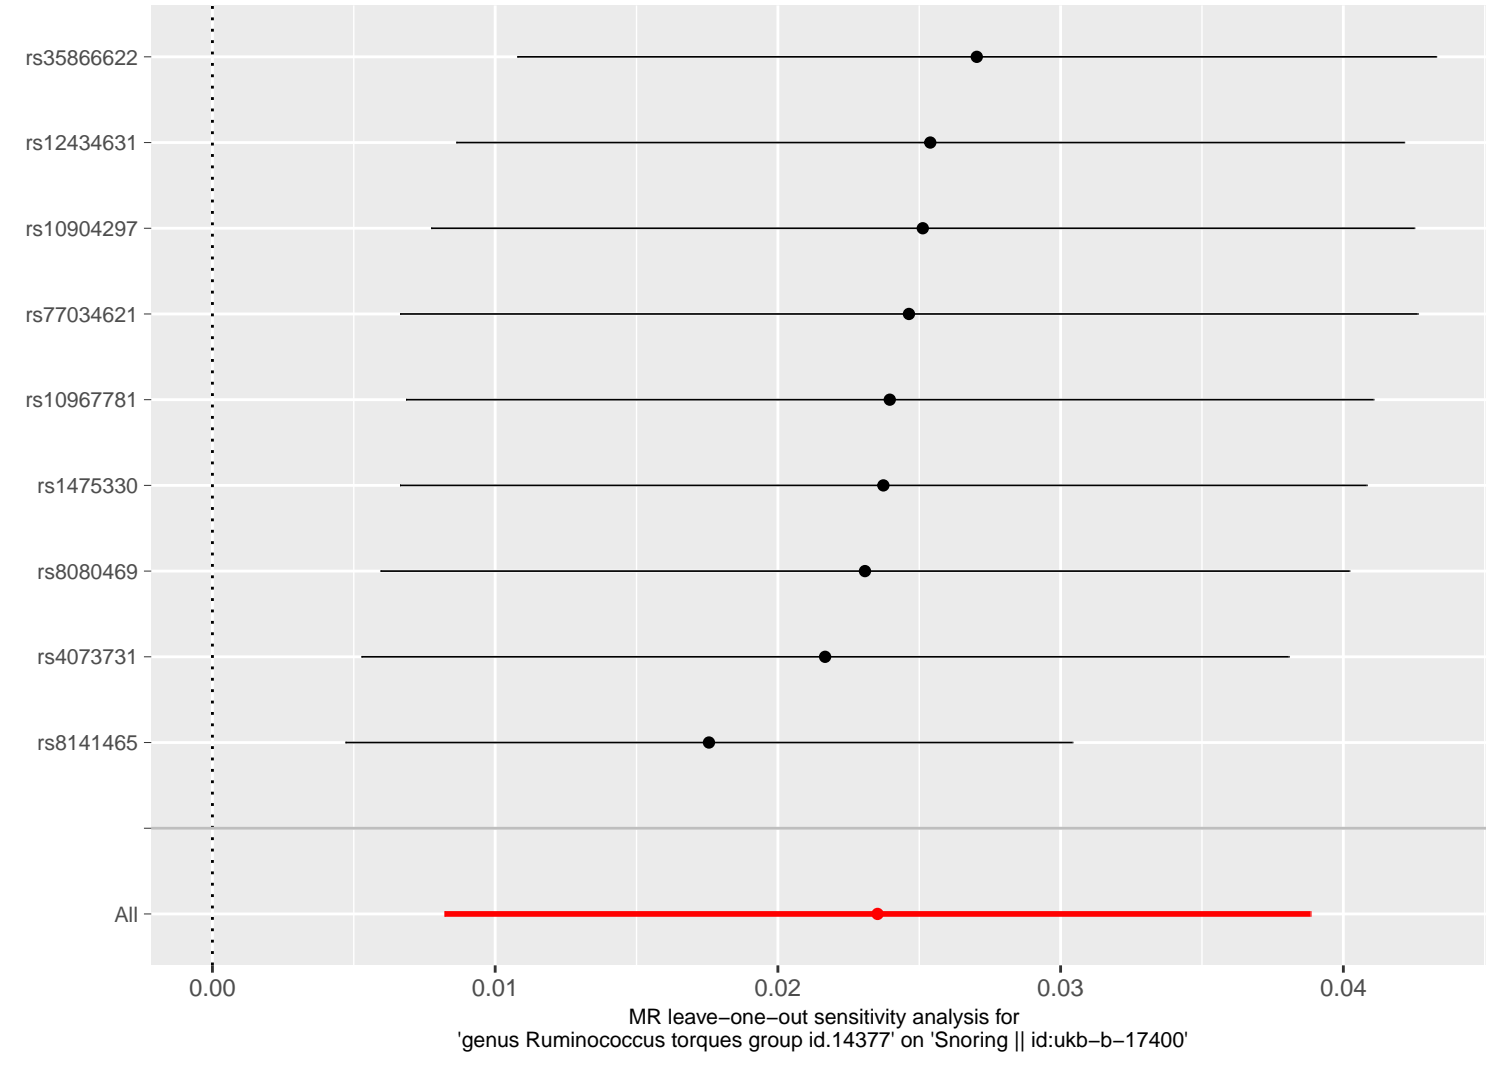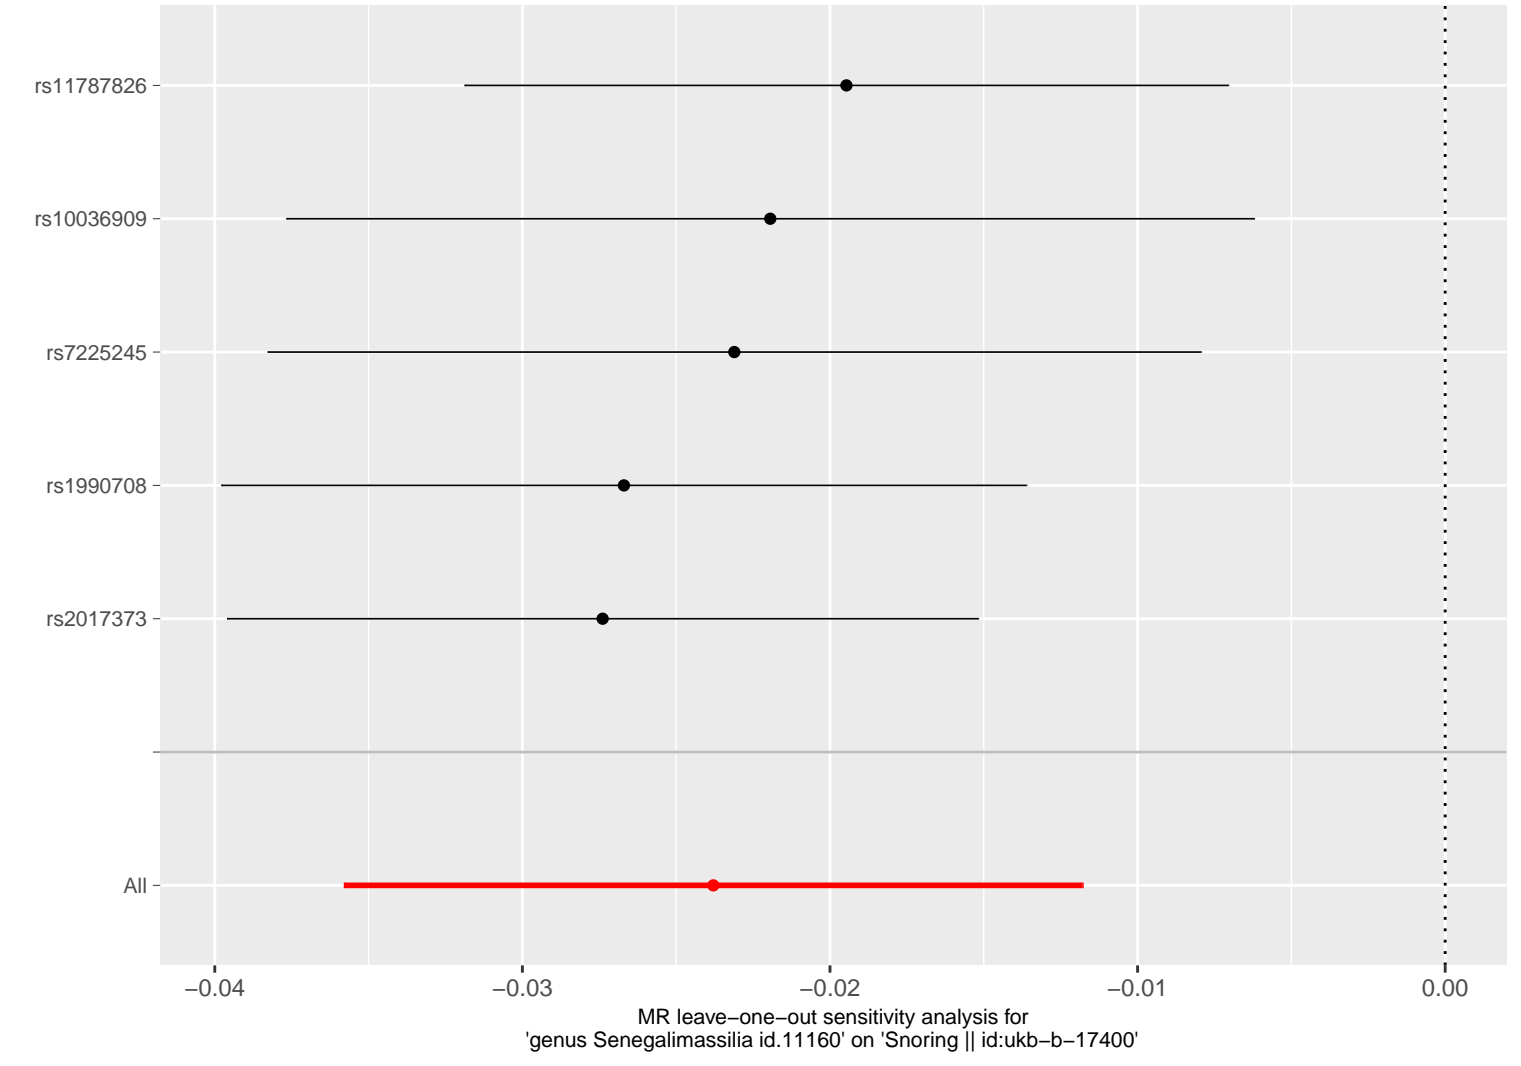

Supplement: s1 [file s1]
